# Supplementary material for: Validation of General Anxiety Disorder (GAD-7) questionnaire in Spanish nursing students
Source: PeerJ journal article supplement (doi:10.7717/peerj.14296), 2022-11-01
Supplement: Base_de_datos_GAD7.zip [file Base_de_datos_GAD7.zip]

## Sheet: Respuestas de formulario 1
NID	Grupo	Edad	Sexo	Estado civil	¿Profesas alguna religión?	¿Tienes hijos/as?	Si has respondido afirmativamente a la pregunta anterior especifica cuántos/as	¿Estas trabajando?	Nota media del expediente académico (sobre 10)	¿Era Enfermería tu primera opción?	¿Eres beneficiario/a de Beca para estudiar?	¿Tienes experiencia clínica previa? (Sólo se cuenta para este estudio aquella que sea de forma profesional, no otras prácticas clínicas)	Si has respondido afirmativamente a la pregunta anterior, especifica en qué ámbito, especialidad o titulación (p.e.: TCAE, Técnico de Rayos, Psicología Clínica, etc.)	¿Has realizado prácticas clínicas anteriormente en algún hospital, centro de salud o centro sanitario?	Si has contestado que si has realizado prácticas clínicas ya, por favor, indica para que titulación, curso, etc. la realizaste.	¿Por qué has escogido estudiar enfermería?	He seleccionado "otro" en la pregunta anterior:	Qué nivel de estudios previos máximos tenías antes de acceder a enfermería: (selecciona una)	¿Como accediste a los estudios de enfermería?	¿Has superado todas las asignaturas hasta la fecha de hoy?	Si has respondido no a la pregunta anterior dí cuáles	¿Realizas alguna actividad lúdica que te sirva de relajación? (dibujar, pintar, meditar, cantar, tocar algún instrumento, yoga,etc.,)	¿Padeces alguna enfermedad crónica?	Si has respondido sí a la pregunta anterior, especifica cuál:	¿Has tenido alguna vez una crisis de ansiedad?	¿Vives con alguien durante el curso académico?	¿Has pasado la infección por coronavirus?	¿Practicas algún deporte habitualmente?	¿Tu domicilio familiar se encuentra en una ciudad o un pueblo?	¿Estás satisfecho/a con tu profesorado de enfermería?	¿Que crees que debe de mejorar en cuanto al profesorado de enfermería se refiere?	¿Cumple, en general, con tus expectativas la titulación de Enfermería?	En general, ¿Estás satisfecho/a con la universidad? (acceso a recursos, horarios, etc.)	Si has respondido nada o poco satisfecho/a en la pregunta anterior, especifíca que es lo que no te satisface	¿Que méjorarias de los estudios de enfermeria que estas cursando? (infraestructuras, horarios, material, contenidos, etc.)	¿Te sientes motivado/a en tus estudios de enfermería?	Por favor responde sinceramente marcando en la tabla la opción que más se ajusta a tu situación. Durante las últimas 2 semanas, ¿qué tan seguido ha tenido molestias debido a los siguientes problemas? Marca únicamente la casilla que más se corresponda en cada fila. [Se ha sentido nervioso(a), ansioso(a) o con los nervios]	Por favor responde sinceramente marcando en la tabla la opción que más se ajusta a tu situación. Durante las últimas 2 semanas, ¿qué tan seguido ha tenido molestias debido a los siguientes problemas? Marca únicamente la casilla que más se corresponda en cada fila. [No ha sido capaz de parar o controlar su preocupación]	Por favor responde sinceramente marcando en la tabla la opción que más se ajusta a tu situación. Durante las últimas 2 semanas, ¿qué tan seguido ha tenido molestias debido a los siguientes problemas? Marca únicamente la casilla que más se corresponda en cada fila. [Se ha preocupado demasiado por motivos diferentes]	Por favor responde sinceramente marcando en la tabla la opción que más se ajusta a tu situación. Durante las últimas 2 semanas, ¿qué tan seguido ha tenido molestias debido a los siguientes problemas? Marca únicamente la casilla que más se corresponda en cada fila. [Ha tenido dificultad para relajarse]	Por favor responde sinceramente marcando en la tabla la opción que más se ajusta a tu situación. Durante las últimas 2 semanas, ¿qué tan seguido ha tenido molestias debido a los siguientes problemas? Marca únicamente la casilla que más se corresponda en cada fila. [Se ha sentido tan inquieto(a) que no ha podido quedarse quieto(a)]	Por favor responde sinceramente marcando en la tabla la opción que más se ajusta a tu situación. Durante las últimas 2 semanas, ¿qué tan seguido ha tenido molestias debido a los siguientes problemas? Marca únicamente la casilla que más se corresponda en cada fila. [Se ha molestado o irritado fácilmente]	Por favor responde sinceramente marcando en la tabla la opción que más se ajusta a tu situación. Durante las últimas 2 semanas, ¿qué tan seguido ha tenido molestias debido a los siguientes problemas? Marca únicamente la casilla que más se corresponda en cada fila. [Ha tenido miedo de que algo terrible fuera a pasar]	Reflexione sobre si durante las dos últimas semanas se han presentado algunos de los síntomas que se citan. Marca únicamente la casilla que más se corresponda en cada fila. [¿Se ha sentido muy excitado, nervioso o en tensión?]	Reflexione sobre si durante las dos últimas semanas se han presentado algunos de los síntomas que se citan. Marca únicamente la casilla que más se corresponda en cada fila. [¿Ha estado muy preocupado por algo?]	Reflexione sobre si durante las dos últimas semanas se han presentado algunos de los síntomas que se citan. Marca únicamente la casilla que más se corresponda en cada fila. [¿Se ha sentido muy irritable?]	Reflexione sobre si durante las dos últimas semanas se han presentado algunos de los síntomas que se citan. Marca únicamente la casilla que más se corresponda en cada fila. [¿Ha tenido dificultad para relajarse?]	Reflexione sobre si durante las dos últimas semanas se han presentado algunos de los síntomas que se citan. Marca únicamente la casilla que más se corresponda en cada fila. [¿Ha dormido mal, ha tenido dificultades para dormir?]	Reflexione sobre si durante las dos últimas semanas se han presentado algunos de los síntomas que se citan. Marca únicamente la casilla que más se corresponda en cada fila. [¿Ha tenido dolores de cabeza o nuca?]
1	0	32	Femenino	Casado/a	No	No	0	Sí	8.4	Sí	Sí	No		No		Oportunidades internacionales		Grado Universitario/Titulación Universitaria	Selectividad	Sí		Sí	No		No	marido	Sí	Sí	Ciudad	Bastante satisfecho/a	1	Bastante	Bastante satisfecho/a		1	Sí	Varios días	Ningún día	Ningún día	Ningún día	Ningún día	Ningún día	Ningún día	Sí	No	No	No	No	No
2	0	21	Femenino	Soltero/a	Si, aunque no soy practicante	No	0	No	8.23	Sí	Sí	No		Sí	8	Vocación		Bachillerato	Formación profesional	No	1	Sí	Sí	1	No	Mi nucleo familiar (padres, hermanos, etc)	Sí	No	Ciudad	Satisfecho/a	2	Bastante	Bastante satisfecho/a		2	Sí	Más de la mitad de los días	Casi todos los días	Más de la mitad de los días	Casi todos los días	Varios días	Varios días	Varios días	Sí	Sí	Sí	Sí	Sí	Sí
3	0	20	Femenino	Otro	Si, soy practicante	No	0	No	9	Sí	No	No		Sí	1	Vocación	1	Bachillerato	Formación profesional	Sí		Sí	No		Sí	Mi nucleo familiar (padres, hermanos, etc)	No	Sí	Ciudad	Bastante satisfecho/a	3	Bastante	Muy satisfecho/a		2	Sí	Casi todos los días	Más de la mitad de los días	Más de la mitad de los días	Más de la mitad de los días	Más de la mitad de los días	Varios días	Ningún día	Sí	Sí	No	Sí	No	Sí
4	0	20	Femenino	Soltero/a	Si, aunque no soy practicante	No	0	No	8.04	Sí	No	No		Sí	1	Vocación		Bachillerato	Formación profesional	Sí		No	No		Sí	Otros compañer@s de otras titulaciones	Sí	No	Pueblo	Satisfecho/a	2	Bastante	Bastante satisfecho/a		2	Sí	Varios días	Ningún día	Varios días	Varios días	Varios días	Ningún día	Ningún día	Sí	Sí	No	Sí	Sí	Sí
5	0	21	Femenino	Soltero/a	Si, soy practicante	No	0	No	8.9	Sí	Sí	Sí	4	No		Vocación		Bachillerato	Formación profesional	No	1	Sí	No		Sí	Mi nucleo familiar (padres, hermanos, etc)	Sí	Sí	Pueblo	Satisfecho/a	2	Bastante	Satisfecho/a		2	Sí	Varios días	Varios días	Varios días	Más de la mitad de los días	Varios días	Varios días	Varios días	Sí	Sí	Sí	Sí	Sí	No
6	0	18	Femenino	Soltero/a	Si, soy practicante	No	0	No	0	Sí	No	No		No		Salidas profesionales		Bachillerato	Selectividad	No	1	No	No		Sí	Otros compañer@s de otras titulaciones	No	No	Pueblo	Bastante satisfecho/a	3	Bastante	Bastante satisfecho/a		2	Sí	Casi todos los días	Varios días	Más de la mitad de los días	Varios días	Casi todos los días	Casi todos los días	Casi todos los días	Sí	Sí	Sí	Sí	Sí	No
7	0	19	Femenino	Soltero/a	Si, soy practicante	No	0	No	8	Sí	No	No		No		Vocación	1	Bachillerato	Selectividad	Sí		Sí	No		No	Mi nucleo familiar (padres, hermanos, etc)	No	No	Ciudad	Satisfecho/a	2	Lo sufiente	Satisfecho/a		2	Sí	Varios días	Casi todos los días	Casi todos los días	Varios días	Varios días	Más de la mitad de los días	Casi todos los días	Sí	Sí	Sí	Sí	Sí	Sí
8	0	18	Femenino	Soltero/a	No	No	0	No	6.9	Sí	No	No		No		Vocación	1	Bachillerato	Selectividad	No	1	Sí	No		Sí	Otros compañer@s de otras titulaciones	Sí	Sí	Ciudad	Bastante satisfecho/a	2	Bastante	Muy satisfecho/a		3	Sí	Casi todos los días	Más de la mitad de los días	Casi todos los días	Varios días	Varios días	Más de la mitad de los días	Casi todos los días	Sí	Sí	No	Sí	No	Sí
9	0	19	Femenino	Soltero/a	Si, soy practicante	No	0	No	8.5	No	No	No		No		No puede estudiar lo que queria		Bachillerato	Selectividad	Sí		No	No		Sí	Otros compañer@s de otras titulaciones	Sí	Sí	Pueblo	Satisfecho/a	3	Bastante	Muy satisfecho/a		2	No	Varios días	Varios días	Más de la mitad de los días	Más de la mitad de los días	Casi todos los días	Más de la mitad de los días	Más de la mitad de los días	Sí	Sí	No	Sí	Sí	No
10	0	18	Femenino	Soltero/a	No	No	0	No	8.3	Sí	No	No		No		Vocación		Bachillerato	Selectividad	Sí		Sí	No		Sí	Mixto (compañer@s de titulación y de otras ramas)	No	No	Pueblo	Bastante satisfecho/a	3	Mucho	Bastante satisfecho/a		2	Sí	Más de la mitad de los días	Varios días	Casi todos los días	Más de la mitad de los días	Varios días	Varios días	Ningún día, Varios días	Sí	Sí	Sí	Sí	Sí	Sí
11	0	21	Femenino	Soltero/a	Si, aunque no soy practicante	No	0	No	9.3	Sí	Sí	Sí	2	No		Vocación	1	Bachillerato	Formación profesional	Sí		Sí	No		Sí	Mi nucleo familiar (padres, hermanos, etc)	No	No	Ciudad	Satisfecho/a	4	Lo sufiente	Poco satisfecho/a	1	3	Sí	Varios días	Varios días	Más de la mitad de los días	Varios días	Varios días	Varios días	Ningún día	Sí	Sí	Sí	Sí	Sí	Sí
12	0	19	Femenino	Soltero/a	No	No	0	No	9	Sí	No	No		No		Vocación		Bachillerato	Selectividad	Sí		No	No		Sí	Otros compañer@s de Enfermería	Sí	No	Ciudad	Bastante satisfecho/a	2	Lo sufiente	Muy satisfecho/a		3	No	Casi todos los días	Varios días	Casi todos los días	Varios días	Ningún día	Ningún día	Más de la mitad de los días	Sí	Sí	Sí	Sí	No	No
13	0	19	Femenino	Soltero/a	No	No	0	No	8.7	Sí	No	No		No		Vocación		Bachillerato	Selectividad	Sí		Sí	No		Sí	Otros compañer@s de otras titulaciones	Sí	Sí	Ciudad	Bastante satisfecho/a	2	Bastante	Bastante satisfecho/a		3	Sí	Varios días	Varios días	Ningún día	Casi todos los días	Casi todos los días	Varios días	Ningún día	Sí	Sí	Sí	Sí	No	Sí
14	0	18	Femenino	Soltero/a	No	No	0	No	9.75	Sí	Sí	No		No		Vocación		Bachillerato	Selectividad	No	1	Sí	Sí	1	Sí	Otros compañer@s de otras titulaciones	Sí	Sí	Ciudad	Bastante satisfecho/a	1	Lo sufiente	Satisfecho/a		2	No	Casi todos los días	Más de la mitad de los días	Casi todos los días	Más de la mitad de los días	Casi todos los días	Casi todos los días	Casi todos los días	Sí	Sí	Sí	Sí	Sí	No
15	0	21	Femenino	Soltero/a	No	No	0	No	8.25	Sí	Sí	Sí	1	Sí	1	Vocación	1	Bachillerato	Formación profesional	Sí		Sí	No		Sí	Otros compañer@s de otras titulaciones	Sí	No	Ciudad	Satisfecho/a	2	Bastante	Satisfecho/a		3	Sí	Casi todos los días	Más de la mitad de los días	Más de la mitad de los días	Más de la mitad de los días	Casi todos los días	Varios días	Más de la mitad de los días	Sí	Sí	Sí	Sí	Sí	Sí
16	0	19	Femenino	Soltero/a	Si, aunque no soy practicante	No	0	No	8	No	No	No		No		No puede estudiar lo que queria		Bachillerato	Selectividad	Sí		Sí	No		Sí	Otros compañer@s de otras titulaciones	No	Sí	Pueblo	Satisfecho/a	2	Bastante	Bastante satisfecho/a	.		Sí	Casi todos los días	Casi todos los días	Casi todos los días	Casi todos los días	Casi todos los días	Casi todos los días	Casi todos los días	Sí	Sí	Sí	Sí	Sí	Sí
17	0	29	Femenino	Soltero/a	No	No	0	No	9.85	No	Sí	Sí	3	Sí	3	Vocación		Secundaria	Formación profesional	No	1	No	No		Sí	Mi pareja	No	No	Pueblo	Satisfecho/a		Poco	Poco satisfecho/a	2	2	No	Varios días	Ningún día	Varios días	Varios días	Ningún día	Varios días	Ningún día	No	Sí	No	Sí	Sí	Sí
18	0	19	Femenino	Soltero/a	Si, aunque no soy practicante	No	0	No	9.6	Sí	Sí	No		No		Vocación		Bachillerato	Selectividad	Sí		No	No		No	Mi nucleo familiar (padres, hermanos, etc)	Sí	No	Ciudad	Bastante satisfecho/a	2	Bastante	Satisfecho/a		2	Sí	Más de la mitad de los días	Varios días	Más de la mitad de los días	Más de la mitad de los días	Ningún día	Más de la mitad de los días	Ningún día	Sí	Sí	Sí	Sí	No	Sí
19	0	21	Femenino	Soltero/a	Si, soy practicante	No	0	No	9.79	Sí	No	No		No		Vocación		Bachillerato	Formación profesional	No	1	No	No		Sí	Mi nucleo familiar (padres, hermanos, etc)	Sí	Sí	Pueblo	Bastante satisfecho/a	2	Mucho	Muy satisfecho/a			Sí	Varios días	Varios días	Más de la mitad de los días	Varios días	Varios días	Varios días	Varios días	Sí	Sí	Sí	Sí	Sí	Sí
20	0	19	Femenino	Soltero/a	Si, aunque no soy practicante	No	0	No	7	Sí	No	No		No		Vocación		Bachillerato	Selectividad	Sí		Sí	No		Sí	Mixto (compañer@s de titulación y de otras ramas)	Sí	No	Ciudad	Satisfecho/a	3	Lo sufiente	Bastante satisfecho/a		2	Sí	Más de la mitad de los días	Más de la mitad de los días	Casi todos los días	Más de la mitad de los días	Varios días	Varios días	Más de la mitad de los días	Sí	Sí	Sí	Sí	No	Sí
21	0	18	Femenino	Soltero/a	Si, aunque no soy practicante	No	0	No	9	No	Sí	No		No		No puede estudiar lo que queria		Bachillerato	Selectividad	Sí		Sí	No		No	Otros compañer@s de otras titulaciones	No	No	Pueblo	Bastante satisfecho/a	1	Bastante	Bastante satisfecho/a		2	Sí	Varios días	Varios días	Varios días	Varios días	Ningún día	Varios días	Varios días	Sí	Sí	Sí	Sí	No	Sí
22	0	18	Femenino	Soltero/a	Si, aunque no soy practicante	No	0	No	8	Sí	Sí	No		No		Vocación		Bachillerato	Selectividad	Sí		Sí	No		Sí	Mi nucleo familiar (padres, hermanos, etc)	Sí	No	Pueblo	Satisfecho/a	1	Lo sufiente	Satisfecho/a		2	Sí	Casi todos los días	Casi todos los días	Casi todos los días	Casi todos los días	Casi todos los días	Casi todos los días	Casi todos los días	Sí	Sí	Sí	Sí	Sí	No
23	0	18	Masculino	Soltero/a	Si, soy practicante	No	0	No	9.67	No	Sí	No		No		No puede estudiar lo que queria		Bachillerato	Selectividad	Sí		Sí	No		Sí	Mi nucleo familiar (padres, hermanos, etc)	Sí	Sí	Ciudad	Bastante satisfecho/a	3	Bastante	Muy satisfecho/a		2	Sí	Varios días	Ningún día	Ningún día	Varios días	Varios días	Varios días	Varios días	Sí	Sí	Sí	Sí	No	Sí
24	0	18	Femenino	Soltero/a	Si, soy practicante	No	0	No	8.4	Sí	No	No		No		Vocación		Bachillerato	Selectividad	Sí		Sí	No		No	Mi nucleo familiar (padres, hermanos, etc)	No	Sí	Ciudad	Bastante satisfecho/a	1	Bastante	Bastante satisfecho/a			Sí	Varios días	Ningún día	Varios días	Ningún día	Ningún día, Varios días	Varios días	Varios días	Sí	Sí	Sí	Sí	Sí	Sí
25	0	19	Masculino	Soltero/a	No	No	0	No	7	Sí	Sí	No		No		Vocación		Bachillerato	Selectividad	Sí		Sí	No		No	Otros compañer@s de otras titulaciones	Sí	Sí	Ciudad	Satisfecho/a	1	Bastante	Muy satisfecho/a		2	Sí	Varios días	Varios días	Varios días	Más de la mitad de los días	Ningún día	Varios días	Más de la mitad de los días	Sí	Sí	Sí	Sí	No	Sí
26	0	21	Femenino	Soltero/a	Si, aunque no soy practicante	No	0	No	9.08	Sí	No	No		Sí		Vocación		Bachillerato	Formación profesional	No	1	No	No		Sí	Otros compañer@s de otras titulaciones	No	No	Ciudad	Poco satisfecho/a	2	Lo sufiente	Satisfecho/a		2	Sí	Casi todos los días	Más de la mitad de los días	Casi todos los días	Casi todos los días	Casi todos los días	Casi todos los días	Casi todos los días	Sí	Sí	Sí	Sí	Sí	Sí
27	0	21	Femenino	Soltero/a	Si, aunque no soy practicante	No	0	No	9.36	Sí	Sí	No		Sí	5	Vocación		Bachillerato	Formación profesional	Sí		Sí	No		Sí	Mi nucleo familiar (padres, hermanos, etc)	Sí	Sí	Pueblo	Satisfecho/a	2	Bastante	Satisfecho/a		2	Sí	Varios días	Ningún día	Más de la mitad de los días	Ningún día	Ningún día	Más de la mitad de los días	Más de la mitad de los días	Sí	Sí	Sí	No	Sí	Sí
28	0	19	Femenino	Soltero/a	Si, soy practicante	No	0	No	9.81	Sí	Sí	No		No		Vocación		Bachillerato	Selectividad	No	1	No	No		Sí	Mixto (compañer@s de titulación y de otras ramas)	No	No	Pueblo	Satisfecho/a	2	Lo sufiente	Satisfecho/a		2	Sí	Casi todos los días	Más de la mitad de los días, Casi todos los días	Más de la mitad de los días	Varios días	Más de la mitad de los días	Más de la mitad de los días	Casi todos los días	Sí	Sí	Sí	Sí	No	No
29	0	21	Femenino	Soltero/a	No	No	0	No	7.52	Sí	Sí	No		Sí	9	Vocación		Bachillerato	Formación profesional	Sí		No	Sí	2	No	Otros compañer@s de otras titulaciones	Sí	No	Pueblo	Bastante satisfecho/a	1	Bastante	Bastante satisfecho/a		3	Sí	Varios días	Varios días	Más de la mitad de los días	Más de la mitad de los días	Varios días	Ningún día	Ningún día	Sí	Sí	No	Sí	Sí	Sí
30	0	18	Femenino	Soltero/a	No	No	0	No	9.8	Sí	Sí	No		No		Vocación		Bachillerato	Selectividad	No	1	Sí	No		Sí	Mixto (compañer@s de titulación y de otras ramas)	Sí	Sí	Pueblo	Satisfecho/a	2	Poco	Satisfecho/a		2	No	Casi todos los días	Más de la mitad de los días	Casi todos los días	Casi todos los días	Casi todos los días	Casi todos los días	Varios días	Sí	Sí	Sí	Sí	No	Sí
31	0	24	Femenino	Soltero/a	No	No	0	No	9.05	Sí	No	No		No		Salidas profesionales		Grado Universitario/Titulación Universitaria	Selectividad	No	1	Sí	No		Sí	Mi nucleo familiar (padres, hermanos, etc)	No	No	Ciudad	Bastante satisfecho/a	2	Bastante	Bastante satisfecho/a		3	Sí	Casi todos los días	Más de la mitad de los días	Más de la mitad de los días	Casi todos los días	Casi todos los días	Más de la mitad de los días	Ningún día	Sí	Sí	Sí	Sí	Sí	Sí
32	0	19	Masculino	Soltero/a	Si, aunque no soy practicante	No	0	No	9.81	No	Sí	No		No		No puede estudiar lo que queria		Bachillerato	Selectividad	Sí		Sí	No		No	Otros compañer@s de otras titulaciones	No	Sí	Pueblo	Satisfecho/a	2	Bastante	Satisfecho/a		2	Sí	Más de la mitad de los días	Más de la mitad de los días	Varios días	Varios días	Ningún día	Varios días	Más de la mitad de los días	Sí	Sí	Sí	No	No	Sí
33	0	20	Femenino	Soltero/a	Si, aunque no soy practicante	No	0	No	8.98	Sí	Sí	No		No		Vocación		Bachillerato	Selectividad	No	1	Sí	Sí	3	Sí	Otros compañer@s de otras titulaciones	Sí	No	Pueblo	Satisfecho/a	2	Bastante	Bastante satisfecho/a		2	Sí	Varios días	Varios días	Más de la mitad de los días	Más de la mitad de los días	Varios días	Más de la mitad de los días	Varios días	Sí	Sí	Sí	Sí	Sí	Sí
34	0	18	Femenino	Soltero/a	Si, soy practicante	No	0	No	8.18	Sí	No	No		No		Vocación		Bachillerato	Selectividad	Sí		No	No		No	Mi nucleo familiar (padres, hermanos, etc)	No	Sí	Pueblo	Satisfecho/a	1	Lo sufiente	Satisfecho/a		3	Sí	Casi todos los días	Casi todos los días	Casi todos los días	Casi todos los días	Casi todos los días	Casi todos los días	Más de la mitad de los días	Sí	Sí	Sí	Sí	Sí	Sí
35	0	21	Femenino	Soltero/a	Si, aunque no soy practicante	No	0	No	9.53	Sí	Sí	No		Sí	1	Vocación		Bachillerato	Formación profesional	No	1	Sí	No		Sí	Mi nucleo familiar (padres, hermanos, etc)	Sí	Sí	Pueblo	Bastante satisfecho/a	1	Mucho	Satisfecho/a		2	Sí	Más de la mitad de los días	Varios días	Varios días	Más de la mitad de los días	Varios días	Varios días	Varios días	Sí	Sí	Sí	Sí	Sí	Sí
36	0	18	Masculino	Soltero/a	Si, soy practicante	No	0	No	9.87	No	No	No		No		No puede estudiar lo que queria		Bachillerato	Selectividad	Sí		Sí	No		No	Mi nucleo familiar (padres, hermanos, etc)	Sí	Sí	Ciudad	Bastante satisfecho/a	4	Bastante	Bastante satisfecho/a		2	Sí	Varios días	Ningún día	Más de la mitad de los días	Ningún día	Varios días	Más de la mitad de los días	Ningún día	No	Sí	No	No	No	Sí
37	0	18	Femenino	Soltero/a	No	No	0	No	7.52	Sí	Sí	No		No		Vocación		Bachillerato	Selectividad	No	1	Sí	No		Sí	Mixto (compañer@s de titulación y de otras ramas)	No	Sí	Ciudad	Satisfecho/a		Bastante	Satisfecho/a		2	Sí	Varios días	Varios días	Más de la mitad de los días	Casi todos los días	Varios días	Ningún día	Ningún día	No	Sí	Sí	Sí	Sí	No
38	0	18	Femenino	Soltero/a	Si, aunque no soy practicante	No	0	No	10	No	Sí	No		No		No puede estudiar lo que queria		Bachillerato	Selectividad	Sí		No	No		Sí	Mis compañer@s no son universitarios	No	Sí	Pueblo	Satisfecho/a	2	Bastante	Satisfecho/a		2	Sí	Casi todos los días	Casi todos los días	Casi todos los días	Casi todos los días	Más de la mitad de los días	Varios días	Varios días	Sí	Sí	Sí	Sí	Sí	Sí
39	0	18	Femenino	Soltero/a	No	No	0	No	8.94	Sí	No	No		No		Vocación		Bachillerato	Selectividad	Sí		Sí	No		Sí	Mi nucleo familiar (padres, hermanos, etc)	No	Sí	Ciudad	Satisfecho/a	3	Mucho	Satisfecho/a		4	Sí	Varios días	Varios días	Ningún día	Más de la mitad de los días	Ningún día	Ningún día	Ningún día	No	No	No	Sí	No	Sí
40	0	19	Femenino	Soltero/a	Si, aunque no soy practicante	No	0	No	8.18	Sí	Sí	No		No		Vocación		Bachillerato	Selectividad	Sí		Sí	Sí		Sí	No, yo vivo solo/a	Sí	Sí	Ciudad	Bastante satisfecho/a	1	Bastante	Bastante satisfecho/a		2	Sí	Varios días	Varios días	Varios días	Ningún día	Ningún día	Ningún día	Ningún día, Varios días	No	Sí	No	No	Sí	Sí
41	0	19	Masculino	Soltero/a	Si, aunque no soy practicante	No	0	No	9.6	Sí	No	No		No		Vocación		Bachillerato	Selectividad	No	1	Sí	No		No	Mixto (compañer@s de titulación y de otras ramas)	Sí	Sí	Pueblo	Satisfecho/a	2	Lo sufiente	Satisfecho/a		3	Sí	Casi todos los días	Casi todos los días	Más de la mitad de los días	Varios días	Casi todos los días	Casi todos los días	Más de la mitad de los días	Sí	Sí	Sí	No	No	No
42	0	20	Masculino	Soltero/a	No	No	0	No	9.7	Sí	No	No		Sí	9	Vocación		Bachillerato	Formación profesional	No	1	No	No		Sí	Mixto (compañer@s de titulación y de otras ramas)	Sí	No	Ciudad	Satisfecho/a	4	Lo sufiente	Satisfecho/a	2	3	No	Más de la mitad de los días	Ningún día	Más de la mitad de los días, Casi todos los días	Más de la mitad de los días, Casi todos los días	Varios días	Más de la mitad de los días	Casi todos los días	Sí	Sí	Sí	Sí	No	No
43	0	20	Femenino	Otro	Si, aunque no soy practicante	No	0	No	8.2	Sí	Sí	Sí	5	Sí	5	Vocación		Bachillerato	Formación profesional	Sí		No	No		Sí	Otros compañer@s de otras titulaciones	Sí	No	Pueblo	Bastante satisfecho/a	3	Bastante	Satisfecho/a		2	Sí	Varios días	Ningún día	Varios días	Varios días	Varios días	Ningún día	Ningún día	Sí	Sí	No	Sí	No	No
44	0	20	Masculino	Soltero/a	No	No	0	No	9.55	Sí	Sí	Sí	5	Sí	5	Salidas profesionales		Bachillerato	Formación profesional	Sí		Sí	No		Sí	Mi nucleo familiar (padres, hermanos, etc)	No	Sí	Pueblo	Satisfecho/a		Bastante	Bastante satisfecho/a		2	No	Ningún día	Ningún día	Más de la mitad de los días	Más de la mitad de los días	Ningún día	Varios días	Ningún día	No	Sí	Sí	Sí	Sí	Sí
45	0	19	Femenino	Soltero/a	Si, aunque no soy practicante	No	0	No	8.33	Sí	Sí	No		No		Vocación		Bachillerato	Selectividad	No	1	Sí	No		No	Mixto (compañer@s de titulación y de otras ramas)	No	No	Pueblo	Bastante satisfecho/a	2	Bastante	Bastante satisfecho/a		2	Sí	Varios días	Varios días	Ningún día	Varios días	Ningún día	Ningún día	Ningún día	Sí	Sí	No	Sí	No	No
46	0	19	Femenino	Soltero/a	Si, soy practicante	No	0	No	8.6	Sí	No	No		No		Vocación		Bachillerato	Selectividad	Sí		No	No		Sí	Mixto (compañer@s de titulación y de otras ramas)	No	No	Ciudad	Bastante satisfecho/a	2	Bastante	Bastante satisfecho/a		2	Sí	Más de la mitad de los días	Ningún día	Más de la mitad de los días	Varios días	Ningún día	Ningún día	Varios días	Sí	Sí	No	Sí	No	Sí
47	0	20	Femenino	Soltero/a	Si, soy practicante	No	0	No	7.5	Sí	Sí	No		No		Vocación		Bachillerato	Formación profesional	No	1	No	No		Sí	Mi nucleo familiar (padres, hermanos, etc)	Sí	Sí	Ciudad	Satisfecho/a	2	Mucho	Muy satisfecho/a		3	Sí	Más de la mitad de los días	Ningún día	Ningún día	Más de la mitad de los días	Ningún día	Varios días	Varios días	Sí	Sí	No	Sí	No	No
48	0	19	Femenino	Soltero/a	No	No	0	No	8.74	No	No	No		No		Otro: (especificar)	2	Bachillerato	Selectividad	Sí		No	No		Sí	Mi nucleo familiar (padres, hermanos, etc)	No	No	Ciudad	Satisfecho/a	2	Lo sufiente	Satisfecho/a		2	No	Varios días	Varios días	Varios días	Varios días	Más de la mitad de los días	Varios días	Ningún día	Sí	Sí	Sí	Sí	No	Sí
49	0	18	Femenino	Soltero/a	Si, aunque no soy practicante	No	0	No	10	No	No	No		No		Otro: (especificar)	3	Grado Universitario/Titulación Universitaria	Selectividad	Sí		No	No		Sí	Mi nucleo familiar (padres, hermanos, etc)	No	Sí	Ciudad	Satisfecho/a	2	Bastante	Satisfecho/a		5	Sí	Ningún día	Ningún día	Ningún día	Ningún día	Ningún día	Ningún día, Más de la mitad de los días	Ningún día	Sí	Sí	No	No	No	No
50	0	20	Femenino	Soltero/a	Si, aunque no soy practicante	No	0	No	9.6	No	No	Sí	1	Sí	1	No puede estudiar lo que queria		Bachillerato	Formación profesional	No	1	No	No		Sí	Otros compañer@s de Enfermería	No	No	Ciudad	Satisfecho/a	1	Lo sufiente	Bastante satisfecho/a		2	No	Varios días	Varios días	Varios días	Varios días	Varios días	Varios días	Varios días	Sí	Sí	Sí	Sí	Sí, No	Sí
51	0	21	Femenino	Soltero/a	Si, aunque no soy practicante	No	0	No	9.3	Sí	No	Sí	1	Sí	1	Salidas profesionales		Bachillerato	Formación profesional	No	1	No	No		Sí	Mi nucleo familiar (padres, hermanos, etc)	Sí	No	Pueblo	Satisfecho/a	2	Lo sufiente	Bastante satisfecho/a		3	No	Más de la mitad de los días	Ningún día	Varios días	Varios días	Ningún día	Ningún día	Ningún día, Varios días	Sí	Sí	No	No	No	Sí
52	0	28	Femenino	Soltero/a	No	No	0	No	8	Sí	Sí	No		No		Vocación		Bachillerato	Prueba de acceso	No	1	Sí	No		Sí	Pareja	No	No	Ciudad	Muy satisfecho/a	2	Bastante	Poco satisfecho/a	2	3	Sí	Varios días	Varios días	Varios días	Varios días	Varios días	Ningún día	Varios días	No	No	No	Sí	Sí	Sí
53	0	21	Femenino	Soltero/a	No	No	0	No	9.5	No	Sí	No		Sí	4	Salidas profesionales		Bachillerato	Formación profesional	Sí		No	No		No	Mi nucleo familiar (padres, hermanos, etc)	Sí	Sí	Ciudad	Satisfecho/a	3	Bastante	Bastante satisfecho/a		5	Sí	Varios días	Ningún día	Varios días	Varios días	Ningún día	Más de la mitad de los días	Varios días	Sí	Sí	Sí	Sí	No	No
54	0	20	Femenino	Soltero/a	Si, aunque no soy practicante	No	0	No	9.2	Sí	Sí	Sí	5	Sí	5	Salidas profesionales		Bachillerato	Formación profesional	Sí		No	Sí	4	No	Mi nucleo familiar (padres, hermanos, etc)	No	No	Pueblo	Bastante satisfecho/a	2	Bastante	Bastante satisfecho/a		5	Sí	Más de la mitad de los días	Ningún día	Varios días	Ningún día	Varios días	Varios días	Ningún día	Sí	Sí	Sí	No	Sí	No
55	0	18	Femenino	Soltero/a	Si, aunque no soy practicante	No	0	No	9	Sí	Sí	No		No		Salidas profesionales		Bachillerato	Selectividad	Sí		Sí	No		No	Mi nucleo familiar (padres, hermanos, etc)	No	No	Pueblo	Satisfecho/a	2	Lo sufiente	Satisfecho/a		2	Sí	Varios días	Ningún día	Varios días	Ningún día	Ningún día	Varios días	Ningún día	No	No	Sí	No	No	Sí
56	0	18	Femenino	Soltero/a	Si, aunque no soy practicante	No	0	No	8	Sí	Sí	No		No		Otro: (especificar)	1	Bachillerato	Selectividad	Sí		Sí	Sí	5	No	Mi nucleo familiar (padres, hermanos, etc)	No	No	Pueblo	Bastante satisfecho/a	2	Bastante	Satisfecho/a		4	Sí	Varios días	Ningún día	Varios días	Ningún día	Ningún día	Varios días	Ningún día	Sí	Sí	Sí	No	No	No
57	0	18	Masculino	Otro	No	No	0	No	8.1	No	Sí	No		No		No puede estudiar lo que queria		Bachillerato	Selectividad	Sí		Sí	No		No	Otros compañer@s de otras titulaciones	No	Sí	Pueblo	Bastante satisfecho/a		Lo sufiente	Satisfecho/a			Sí	Más de la mitad de los días	Varios días	Varios días	Varios días	Ningún día	Varios días	Varios días	Sí	Sí	Sí	Sí	No	No
58	0	18	Femenino	Soltero/a	No	No	0	No	9.95	No	Sí	No		No		Vocación		Bachillerato	Selectividad	Sí		No	No		Sí	Mi nucleo familiar (padres, hermanos, etc)	No	No	Pueblo	Satisfecho/a		Bastante	Bastante satisfecho/a		2	Sí	Varios días	Ningún día	Ningún día	Ningún día	Ningún día	Varios días	Varios días	No	No	Sí	No	Sí, No	Sí
59	0	54	Femenino	Casado/a	Si, aunque no soy practicante	Sí	3	Sí	7.45	Sí	No	Sí	3	Sí	3	Vocación		Secundaria	Prueba de acceso	No	1	No	No	.	Sí	Mi nucleo familiar (padres, hermanos, etc)	Sí	No	Pueblo	Satisfecho/a	2	Bastante	Satisfecho/a		2	Sí	Casi todos los días	Casi todos los días	Casi todos los días	Casi todos los días	Varios días	Más de la mitad de los días	Ningún día	Sí	Sí	Sí	Sí	No	No
60	0	23	Femenino	Soltero/a	Si, aunque no soy practicante	No	0	No	6.27	Sí	Sí	Sí	3	Sí	5	Vocación		Bachillerato	Formación profesional	No	1	Sí	No		Sí	Mi nucleo familiar (padres, hermanos, etc)	Sí	Sí	Ciudad	Satisfecho/a	4	Bastante	Bastante satisfecho/a		6	Sí	Varios días	Ningún día	Varios días	Varios días	Más de la mitad de los días	Ningún día	Ningún día	Sí	Sí, No	No	Sí	No	Sí
61	0	18	Femenino	Soltero/a	No	No	0	No	8.24	No	No	No		No		Vocación		Bachillerato	Selectividad	Sí		No	No		Sí	Mixto (compañer@s de titulación y de otras ramas)	Sí	No	Pueblo	Satisfecho/a	2	Bastante	Bastante satisfecho/a		5	Sí	Varios días	Ningún día	Varios días	Ningún día	Ningún día	Ningún día	Ningún día	No	No	No	No	Sí	Sí
62	0	42	Masculino	Casado/a	Si, aunque no soy practicante	Sí	2	Sí	8	Sí	No	Sí	3	Sí	3	Vocación		Bachillerato	Prueba de acceso	Sí		No	No		Sí	Mi nucleo familiar (padres, hermanos, etc)	Sí	No	Ciudad	Muy satisfecho/a		Mucho	Muy satisfecho/a			Sí	Ningún día	Ningún día	Ningún día	Ningún día	Ningún día	Ningún día	Ningún día	No	No	No	No	No	No
63	0	34	Femenino	Soltero/a	Si, soy practicante	No	0	Sí	8.1	Sí	Sí	Sí	7	No		Vocación	1	Bachillerato	Selectividad	No	2	No	Sí	6	Sí	Mi nucleo familiar (padres, hermanos, etc)	Sí	No	Ciudad	Poco satisfecho/a	2	Poco	Satisfecho/a		4	No	Casi todos los días	Más de la mitad de los días	Varios días	Casi todos los días	Casi todos los días	Casi todos los días	Más de la mitad de los días	Sí	Sí	Sí	Sí	Sí	Sí
64	0	20	Femenino	Soltero/a	No	No	0	No	6.88	Sí	Sí	No		No		Vocación		Bachillerato	Selectividad	No	1	Sí	Sí	1	Sí	Residencia	Sí	Sí	Pueblo	Bastante satisfecho/a		Bastante	Bastante satisfecho/a		2	Sí	Varios días	Varios días	Más de la mitad de los días	Varios días	Varios días	Varios días	Varios días	Sí	Sí	Sí	Sí	No	No
65	0	20	Femenino	Soltero/a	Si, soy practicante	No	0	No	9.3	No	No	Sí	1	Sí	1	No puede estudiar lo que queria		Bachillerato	Selectividad	Sí		No	No		No	Otros compañer@s de Enfermería	Sí	Sí	Ciudad	Satisfecho/a	1	Lo sufiente	Bastante satisfecho/a			Sí	Ningún día	Ningún día	Ningún día	Ningún día	Ningún día	Ningún día	Ningún día	No	No	No	Sí	No	Sí
66	0	20	Femenino	Soltero/a	Si, aunque no soy practicante	No	0	No	8	Sí	Sí	No		Sí	4	Vocación		Bachillerato	Formación profesional	Sí		No	No		Sí	Mi nucleo familiar (padres, hermanos, etc)	Sí	No	Ciudad	Bastante satisfecho/a		Bastante	Bastante satisfecho/a		2	Sí	Más de la mitad de los días	Varios días	Más de la mitad de los días	Más de la mitad de los días	Más de la mitad de los días	Más de la mitad de los días	Varios días	Sí	Sí	Sí	Sí	Sí	Sí
67	0	19	Femenino	Soltero/a	Si, soy practicante	No	0	No	9.16	No	No	No		No		Vocación	3	Bachillerato	Selectividad	Sí		Sí	No		Sí	Otros compañer@s de otras titulaciones	Sí	Sí	Pueblo	Bastante satisfecho/a	1	Mucho	Bastante satisfecho/a		5	Sí	Ningún día	Ningún día	Ningún día	Ningún día	Ningún día	Varios días	Ningún día	No	No	No	No	No	No
68	0	20	Femenino	Soltero/a	Si, soy practicante	No	0	No	7.5	Sí	Sí	No		No		Vocación		Bachillerato	Selectividad	Sí		Sí	No		Sí	Otros compañer@s de otras titulaciones	Sí	Sí	Ciudad	Satisfecho/a	1	Bastante	Bastante satisfecho/a		4	Sí	Más de la mitad de los días	Más de la mitad de los días	Más de la mitad de los días	Más de la mitad de los días	Más de la mitad de los días	Más de la mitad de los días	Más de la mitad de los días	Sí	Sí	Sí	Sí	Sí	Sí
69	0	19	Femenino	Soltero/a	Si, aunque no soy practicante	No	0	No	9.29	Sí	Sí	No		No		Vocación		Bachillerato	Selectividad	Sí		Sí	Sí	1	Sí	Mixto (compañer@s de titulación y de otras ramas)	Sí	No	Pueblo	Satisfecho/a	4	Bastante	Bastante satisfecho/a			Sí	Más de la mitad de los días	Varios días	Casi todos los días	Varios días	Casi todos los días	Varios días	Más de la mitad de los días	Sí	Sí	No	Sí	No	Sí
70	0	20	Femenino	Soltero/a	No	No	0	No	9.09	Sí	Sí	No		Sí	4	Salidas profesionales	1	Bachillerato	Formación profesional	Sí		No	No		Sí	Otros compañer@s de otras titulaciones	Sí	No	Pueblo	Bastante satisfecho/a		Bastante	Bastante satisfecho/a		2	Sí	Ningún día	Varios días	Varios días	Ningún día	Más de la mitad de los días	Más de la mitad de los días	Varios días	Sí	No	Sí	No	Sí	Sí
71	0	50	Femenino	Casado/a	Si, aunque no soy practicante	No	0	Sí	6.1	Sí	Sí	Sí	3	No		Vocación		Secundaria	Formación profesional	No	3	No	No		Sí	Mi marido	No	No	Pueblo	Bastante satisfecho/a	2	Mucho	Muy satisfecho/a		3	Sí	Varios días	Varios días	Varios días	Varios días	Varios días	Varios días	Varios días	Sí	Sí	Sí	No	Sí	Sí
72	0	24	Femenino	Soltero/a	Si, aunque no soy practicante	No	0	No	8.5	Sí	Sí	No		No		Vocación		Bachillerato	Formación profesional	Sí		No	No		Sí	Otros compañer@s de otras titulaciones	No	Sí	Ciudad	Bastante satisfecho/a	2	Poco	Bastante satisfecho/a		4	No	Casi todos los días	Más de la mitad de los días	Casi todos los días	Casi todos los días	Más de la mitad de los días	Más de la mitad de los días	Casi todos los días	Sí	Sí	Sí	Sí	Sí	Sí
73	0	49	Femenino	Divorciado/a	No	Sí	3	Sí	7.5	Sí	Sí	Sí	6	Sí	6	Vocación	1	Bachillerato	Prueba de acceso	No	1	Sí	No		Sí	Mi nucleo familiar (padres, hermanos, etc)	Sí	Sí	Pueblo	Poco satisfecho/a	2	Lo sufiente	Satisfecho/a		3	Sí	Más de la mitad de los días	Más de la mitad de los días	Varios días	Más de la mitad de los días	Varios días	Varios días	Ningún día	Sí	Sí	No	Sí	Sí	Sí
74	0	48	Femenino	Casado/a	Si, soy practicante	No	0	Sí	6.65	Sí	Sí	No		No		Vocación	1	Secundaria	Prueba de acceso	No	1	No	Sí	7	Sí	marido	No	No	Pueblo	Poco satisfecho/a		Lo sufiente	Satisfecho/a		5	Sí	Varios días	Varios días	Varios días	Varios días	Varios días	Ningún día	Varios días	No	Sí	No	Sí	No	No
75	0	21	Femenino	Soltero/a	No	No	0	No	7.44	Sí	No	No		No		Vocación		Bachillerato	Formación profesional	Sí		Sí	No		Sí	Otros compañer@s de otras titulaciones	No	No	Ciudad	Bastante satisfecho/a	1	Bastante	Satisfecho/a		3	Sí	Más de la mitad de los días	Más de la mitad de los días	Casi todos los días	Más de la mitad de los días	Varios días	Más de la mitad de los días	Casi todos los días	Sí	Sí	Sí	Sí	Sí	No
76	0	20	Masculino	Soltero/a	Si, aunque no soy practicante	No	0	No	8	Sí	Sí	No		No		Vocación		Bachillerato	Selectividad	Sí		Sí	No		No	Otros compañer@s de otras titulaciones	Sí	Sí	Ciudad	Satisfecho/a		Mucho	Bastante satisfecho/a		4	Sí	Varios días	Varios días	Varios días	Varios días, Más de la mitad de los días	Ningún día	Más de la mitad de los días	Más de la mitad de los días	Sí	Sí	Sí	No	Sí	Sí
77	0	27	Femenino	Soltero/a	No	No	0	Sí	8.6	No	Sí	No	2	No		Salidas profesionales		Bachillerato	Prueba de acceso	Sí		Sí	No		Sí	Pareja	Sí	Sí	Pueblo	Satisfecho/a	2	Lo sufiente	Satisfecho/a			Sí	Más de la mitad de los días	Más de la mitad de los días	Más de la mitad de los días	Más de la mitad de los días	Más de la mitad de los días	Más de la mitad de los días	Más de la mitad de los días	Sí	Sí	Sí, No	Sí, No	Sí, No	Sí
78	0	19	Femenino	Soltero/a	Si, soy practicante	No	0	No	8.52	Sí	Sí	No		No		Vocación		Bachillerato	Selectividad	No	1	Sí	Sí	1	Sí	Mixto (compañer@s de titulación y de otras ramas)	No	No	Pueblo	Satisfecho/a	1	Bastante	Satisfecho/a		5	Sí	Más de la mitad de los días	Ningún día	Más de la mitad de los días	Varios días	Varios días	Más de la mitad de los días	Ningún día	Sí	No	Sí	Sí	No	Sí
79	0	22	Femenino	Soltero/a	Si, aunque no soy practicante	No	0	No	9.54	No	No	Sí	1	Sí	1	Vocación		Bachillerato	Selectividad	Sí		No	Sí	8	Sí	Otros compañer@s de Enfermería	Sí	No	Pueblo	Satisfecho/a	2	Poco	Satisfecho/a		2	No	Casi todos los días	Varios días	Más de la mitad de los días	Más de la mitad de los días	Ningún día	Varios días	Ningún día	Sí	Sí	Sí	Sí	Sí	Sí
80	0	18	Femenino	Soltero/a	Si, aunque no soy practicante	No	0	No	9.3	No	Sí	No		No		Salidas profesionales		Bachillerato	Selectividad	Sí		Sí	No		No	Mi nucleo familiar (padres, hermanos, etc)	No	Sí	Pueblo	Satisfecho/a	2	Bastante	Bastante satisfecho/a		2	Sí	Más de la mitad de los días	Varios días	Varios días	Más de la mitad de los días	Más de la mitad de los días	Casi todos los días	Más de la mitad de los días	Sí	Sí	Sí	Sí	Sí	Sí
81	0	20	Femenino	Soltero/a	Si, soy practicante	No	0	No	7.5	Sí	Sí	No		No		Vocación		Bachillerato	Formación profesional	Sí		Sí	No		Sí	Otros compañer@s de otras titulaciones	Sí	Sí	Ciudad	Bastante satisfecho/a		Bastante	Bastante satisfecho/a		2	Sí	Casi todos los días	Más de la mitad de los días	Casi todos los días	Casi todos los días	Más de la mitad de los días	Casi todos los días	Más de la mitad de los días	Sí	Sí	Sí	Sí	Sí	Sí
82	0	21	Femenino	Soltero/a	Si, aunque no soy practicante	No	0	No	7.48	Sí	Sí	No		No		Vocación		Bachillerato	Selectividad	Sí		No	No		Sí	Otros compañer@s de otras titulaciones	No	No	Pueblo	Bastante satisfecho/a	4	Bastante	Muy satisfecho/a		2	Sí	Casi todos los días	Más de la mitad de los días	Casi todos los días	Casi todos los días	Más de la mitad de los días	Más de la mitad de los días	Más de la mitad de los días	Sí	Sí	Sí	Sí	Sí	Sí
83	1	20	Femenino	Otro	No	No		No	7.8	No	Sí	No		No		Salidas profesionales		Bachillerato	Selectividad	Sí	4	Sí	No		Sí	Mi nucleo familiar (padres, hermanos, etc)	No	No	Pueblo	Bastante satisfecho/a	5	Bastante	Bastante satisfecho/a		5	Sí	Varios días	Ningún día	Más de la mitad de los días	Ningún día	Ningún día	Varios días	Ningún día	No	No	No	No	No	No
84	1	21	Femenino	Soltero/a	Si, aunque no soy practicante	No		No	8.2	Sí	Sí	No		No		Vocación		Bachillerato	Formación profesional	No	4,5,6	No	No		No	Otros compañer@s de Enfermería	No	Sí	Pueblo	Bastante satisfecho/a		Lo sufiente	Bastante satisfecho/a		6	Sí	Varios días	Ningún día	Varios días	Ningún día	Ningún día	Ningún día	Ningún día	No	Sí	No	No	No	No
85	1	19	Femenino	Soltero/a	Si, aunque no soy practicante	No	0	No	8	Sí	Sí	No		No		Vocación		Bachillerato	Selectividad	Sí	1	No	No		Sí	Mixto (compañer@s de titulación y de otras ramas)	No	No	Pueblo	Satisfecho/a	0	Mucho	Satisfecho/a			Sí	Casi todos los días	Varios días	Varios días	Varios días	Varios días	Varios días	Casi todos los días	Sí	Sí	Sí	Sí	No	Sí
86	1	22	Femenino	Otro	No	No	0	No	8	No	Sí	No		No		Vocación		Bachillerato	Formación profesional	No	4.6	Sí	Sí	2	Sí	Otros compañer@s de otras titulaciones	Sí	Sí	Pueblo	Satisfecho/a	4	Lo sufiente	Satisfecho/a		2	Sí	Casi todos los días	Varios días	Más de la mitad de los días	Más de la mitad de los días	Más de la mitad de los días	Más de la mitad de los días	Más de la mitad de los días	Sí	Sí	Sí	Sí	Sí	Sí
87	1	21	Femenino	Soltero/a	No	No		No	8	Sí	Sí	No	5	No		Vocación		Bachillerato	Formación profesional	No	4.6	No	No		Sí	Otros compañer@s de otras titulaciones	No	No	Pueblo	Bastante satisfecho/a	3	Bastante	Satisfecho/a		5	Sí	Varios días	Varios días	Más de la mitad de los días	Varios días	Varios días	Ningún día, Varios días	Varios días	No	No	No	No	Sí	No
88	1	21	Femenino	Soltero/a	No	No	0	No	8	Sí	Sí	Sí	5	No		Vocación		Bachillerato	Formación profesional	No	4,5,6	No	No		Sí	Otros compañer@s de Enfermería	Sí	Sí	Pueblo	Bastante satisfecho/a		Bastante	Bastante satisfecho/a			Sí	Varios días	Ningún día	Varios días	Varios días	Ningún día	Ningún día	Ningún día	Sí	Sí	No	No	Sí	Sí
89	1	20	Femenino	Soltero/a	No	No		No	8	Sí	Sí	No		No		Vocación		Bachillerato	Selectividad	Sí		No	No		No	Mi nucleo familiar (padres, hermanos, etc)	Sí	No	Pueblo	Muy satisfecho/a		Mucho	Muy satisfecho/a		2	Sí	Varios días	Ningún día	Varios días	Ningún día	Ningún día	Varios días	Varios días	No	Sí	No	No	No	Sí
90	1	22	Femenino	Soltero/a	No	No	0	No	7	Sí	Sí	Sí	8	No		Vocación		Bachillerato	Formación profesional	No	6	No	No		Sí	Mi nucleo familiar (padres, hermanos, etc)	Sí	Sí	Ciudad	Bastante satisfecho/a		Bastante	Bastante satisfecho/a		2	Sí	Varios días	Más de la mitad de los días	Ningún día	Ningún día	Ningún día	Varios días	Ningún día	Sí	Sí	No	No	No	Sí
91	1	22	Femenino	Otro	Si, soy practicante	No	0	No	7.85	Sí	No	No		No		Vocación		Bachillerato	Selectividad	No	4	No	No		Sí	Mixto (compañer@s de titulación y de otras ramas)	Sí	No	Ciudad	Bastante satisfecho/a		Bastante	Satisfecho/a		2	Sí	Más de la mitad de los días	Ningún día	Casi todos los días	Más de la mitad de los días	Varios días	Más de la mitad de los días	Más de la mitad de los días	Sí	Sí	No	Sí	No	Sí
92	1	23	Femenino	Soltero/a	Si, aunque no soy practicante	No	0	No	8.5	Sí	Sí	Sí	1	Sí	1	Vocación		Bachillerato	Formación profesional	No		No	No		Sí	Otros compañer@s de Enfermería	Sí	No	Ciudad	Bastante satisfecho/a		Bastante	Bastante satisfecho/a		2	Sí	Ningún día	Ningún día	Varios días	Más de la mitad de los días	Varios días	Más de la mitad de los días	Más de la mitad de los días	No	Sí	Sí	Sí	Sí	No
93	1	49	Masculino	Soltero/a	No	No	0	No	8.18	Sí	Sí	No		No		Vocación		Estudios primarios	Prueba de acceso	No	4.6	Sí	No		No	No, yo vivo solo/a	No	Sí	Pueblo	Satisfecho/a	4	Bastante	Bastante satisfecho/a		2	Sí	Ningún día	Ningún día	Ningún día	Ningún día	Ningún día	Ningún día	Ningún día	No	No	No	No	Sí	Sí
94	1	19	Femenino	Soltero/a	No	No	0	No	8.1	Sí	Sí	No		No		Vocación		Bachillerato	Selectividad	No	4,5,6	No	No		No	Mi nucleo familiar (padres, hermanos, etc)	No	No	Ciudad	Bastante satisfecho/a	4	Bastante	Bastante satisfecho/a			Sí	Varios días	Ningún día	Varios días	Varios días	Ningún día	Varios días	Ningún día	No	No	Sí	Sí	Sí	No
95	1	19	Femenino	Otro	No	No		Sí	9.6	Sí	Sí	No		No		Vocación		Bachillerato	Selectividad	Sí		Sí	No		Sí	Mi nucleo familiar (padres, hermanos, etc)	No	Sí	Ciudad	Bastante satisfecho/a	3	Bastante	Bastante satisfecho/a		2	Sí	Varios días	Varios días	Más de la mitad de los días	Varios días	Varios días	Varios días	Ningún día	Sí	Sí	Sí	Sí	Sí	Sí
96	1	27	Femenino	Soltero/a	Si, aunque no soy practicante	No		No	8	Sí	No	No		No		Salidas profesionales		Máster	Selectividad	Sí		No	No		Sí	No, yo vivo solo/a	No	No	Pueblo	Satisfecho/a	3	Bastante	Bastante satisfecho/a		2	Sí	Ningún día	Ningún día	Ningún día	Ningún día	Ningún día	Varios días	Ningún día	Sí	No	No	Sí	No	No
97	1	21	Femenino	Soltero/a	Si, aunque no soy practicante	No		No	7.9	No	No	No		No		Salidas profesionales		Bachillerato	Formación profesional	Sí		Sí	Sí	2	Sí	Mi nucleo familiar (padres, hermanos, etc)	No	No	Pueblo	Satisfecho/a	6	Lo sufiente	Bastante satisfecho/a			No	Más de la mitad de los días	Más de la mitad de los días	Casi todos los días	Casi todos los días	Más de la mitad de los días	Más de la mitad de los días	Ningún día	Sí	Sí	Sí	Sí	Sí	Sí
98	1	21	Femenino	Soltero/a	Si, soy practicante	No	0	No	7.7	No	Sí	No		No		No puede estudiar lo que queria		Bachillerato	Selectividad	No	6	Sí	No		Sí	Otros compañer@s de otras titulaciones	No	Sí	Ciudad	Satisfecho/a	6	Bastante	Bastante satisfecho/a		2	Sí	Más de la mitad de los días	Varios días	Más de la mitad de los días	Más de la mitad de los días	Ningún día	Varios días	Más de la mitad de los días	Sí	Sí	No	Sí	Sí	No
99	1	20	Femenino	Soltero/a	Si, aunque no soy practicante	No	0	No	8.45	Sí	Sí	No		No		Vocación		Bachillerato	Selectividad	Sí		Sí	No		No	Mi nucleo familiar (padres, hermanos, etc)	No	No	Pueblo	Muy satisfecho/a	1	Mucho	Bastante satisfecho/a		5	Sí	Varios días	Ningún día	Varios días	Ningún día	Ningún día	Varios días	Ningún día	Sí	Sí	No	No	No	No
100	1	20	Femenino	Soltero/a	Si, soy practicante	No		No	7.75	Sí	Sí	No		No		Salidas profesionales		Bachillerato	Selectividad	Sí		No	No		No	Mi nucleo familiar (padres, hermanos, etc)	No	No	Ciudad	Bastante satisfecho/a	1	Bastante	Bastante satisfecho/a		2	Sí	Varios días	Ningún día	Varios días	Ningún día	Ningún día	Varios días	Ningún día	Sí	No	No	Sí	No	Sí
101	1	19	Femenino	Soltero/a	Si, soy practicante	No	0	No	7.4	Sí	No	No		No		Vocación		Bachillerato	Selectividad	No	4,5,6	Sí	No		Sí	Mi nucleo familiar (padres, hermanos, etc)	No	No	Pueblo	Satisfecho/a	3	Bastante	Satisfecho/a			Sí	Varios días	Ningún día	Varios días	Ningún día	Varios días	Varios días	Varios días	Sí	Sí	Sí	No	No	Sí
102	1	27	Femenino	Casado/a	Si, soy practicante	No	0	Sí	8.24	Sí	No	Sí	4	Sí	4	Salidas profesionales		Grado Universitario/Titulación Universitaria	Otra	Sí		No	No		No	Mi nucleo familiar (padres, hermanos, etc)	No	No	Ciudad	Satisfecho/a		Lo sufiente	Satisfecho/a		2	Sí	Más de la mitad de los días	Varios días	Más de la mitad de los días	Casi todos los días	Más de la mitad de los días	Varios días	Más de la mitad de los días	Sí	Sí	No	Sí	Sí	Sí
103	1	20	Masculino	Soltero/a	No	No		No	7.65	Sí	Sí	No		No		Otro: (especificar)	1	Bachillerato	Selectividad	No	6	No	No		No	Mixto (compañer@s de titulación y de otras ramas)	No	No	Ciudad	Satisfecho/a	4	Bastante	Muy satisfecho/a			Sí	Varios días	Ningún día	Ningún día	Ningún día	Ningún día	Ningún día	Ningún día	Sí	No	No	No	No	No
104	1	19	Femenino	Soltero/a	No	No		No	7.58	Sí	Sí	No		No		Vocación	1	Bachillerato	Selectividad	No	6	No	No		No	Mi nucleo familiar (padres, hermanos, etc)	No	No	Pueblo	Bastante satisfecho/a	1	Bastante	Bastante satisfecho/a		2	Sí	Ningún día	Ningún día	Ningún día	Ningún día	Ningún día	Ningún día	Ningún día	No	No	No	No	No	No
105	1	21	Masculino	Soltero/a	No	No		No	8.86	Sí	No	No		No		Vocación		Bachillerato	Selectividad	Sí		No	No		Sí	Otros compañer@s de Enfermería	No	No	Pueblo	Bastante satisfecho/a	6	Bastante	Bastante satisfecho/a			Sí	Varios días	Varios días	Más de la mitad de los días	Varios días	Varios días	Ningún día	Ningún día	Sí	Sí	No	Sí	Sí	Sí
106	1	25	Femenino	Soltero/a	No	No	0	No	7	No	No	No		No		Salidas profesionales		Grado Universitario/Titulación Universitaria	Selectividad	Sí		Sí	Sí	9	Sí	Mis compañer@s no son universitarios	Sí	No	Ciudad	Poco satisfecho/a	4	Lo sufiente	Satisfecho/a		2	No	Casi todos los días	Más de la mitad de los días	Casi todos los días	Casi todos los días	Casi todos los días	Más de la mitad de los días	Casi todos los días	Sí	Sí	Sí	Sí	Sí	Sí
107	1	19	Femenino	Soltero/a	Si, aunque no soy practicante	No	0	No	8.14	Sí	Sí	No		No		Vocación		Bachillerato	Selectividad	No	4.6	Sí	No		Sí	Mi nucleo familiar (padres, hermanos, etc)	No	No	Pueblo	Bastante satisfecho/a		Mucho	Satisfecho/a			Sí	Varios días	Ningún día	Varios días	Varios días	Ningún día	Ningún día	Ningún día	Sí	Sí	No	Sí	No	No
108	1	20	Masculino	Soltero/a	Si, aunque no soy practicante	No	0	No	8.14	Sí	Sí	No		No		Salidas profesionales		Bachillerato	Selectividad	Sí		No	No		Sí	Mi nucleo familiar (padres, hermanos, etc)	No	Sí	Pueblo	Satisfecho/a	3	Bastante	Bastante satisfecho/a		4	Sí	Ningún día	Ningún día	Varios días	Ningún día	Ningún día	Varios días	Ningún día	Sí	Sí	Sí	No	No	No
109	1	21	Masculino	Soltero/a	No	No		No	7.97	No	Sí	No		No		Salidas profesionales		Bachillerato	Formación profesional	Sí		Sí	No		No	Mi nucleo familiar (padres, hermanos, etc)	No	Sí	Ciudad	Bastante satisfecho/a	4	Bastante	Satisfecho/a		2	No	Varios días	Ningún día	Varios días	Ningún día	Ningún día	Más de la mitad de los días	Ningún día	Sí	No	Sí	No	No	No
110	1	21	Femenino	Soltero/a	Si, aunque no soy practicante	No	0	No	8.5	Sí	Sí	No		No		Vocación		Bachillerato	Formación profesional	No	4,5,6	No	Sí	1	Sí	Mi nucleo familiar (padres, hermanos, etc)	Sí	No	Pueblo	Bastante satisfecho/a	6	Mucho	Satisfecho/a		7	Sí	Varios días	Ningún día	Ningún día	Ningún día	Ningún día	Varios días	Ningún día	No	No	No	No	No	Sí
111	1	19	Femenino	Soltero/a	Si, aunque no soy practicante	No	0	No	8.41	Sí	Sí	No		No		Vocación		Bachillerato	Selectividad	Sí		Sí	No		Sí	Mixto (compañer@s de titulación y de otras ramas)	Sí	Sí	Pueblo	Bastante satisfecho/a	6	Mucho	Bastante satisfecho/a		4	Sí	Más de la mitad de los días	Varios días	Más de la mitad de los días	Varios días	Ningún día	Varios días	Más de la mitad de los días	Sí	Sí	No	Sí	Sí	No
112	1	20	Femenino	Soltero/a	Si, aunque no soy practicante	No		No	7.8	Sí	No	Sí	3	Sí	11	Vocación		Bachillerato	Selectividad	Sí		Sí	No		Sí	En Barcelona donde estudio vivo con una amiga, en Jaen comparto piso con otras personas.	Sí	No	Pueblo	Satisfecho/a		Mucho	Satisfecho/a		9	Sí	Varios días	Varios días	Varios días	Varios días	Varios días	Más de la mitad de los días	Más de la mitad de los días	Sí	Sí	Sí	Sí	Sí	Sí
113	1	22	Femenino	Soltero/a	Si, aunque no soy practicante	No	0	No	8.2	Sí	Sí	No		No		Vocación		Bachillerato	Formación profesional	No	6	Sí	Sí	7	No	Otros compañer@s de Enfermería	No	Sí	Ciudad	Bastante satisfecho/a		Bastante	Bastante satisfecho/a		8	Sí	Ningún día	Ningún día	Varios días	Varios días	Varios días	Varios días	Varios días	No	Sí	Sí	Sí	No	No
114	1	20	Femenino	Soltero/a	Si, aunque no soy practicante	No		No	8.15	Sí	Sí	No		No		Vocación		Bachillerato	Selectividad	No	6	Sí	No		Sí	Otros compañer@s de Enfermería	Sí	No	Pueblo	Bastante satisfecho/a	1	Bastante	Bastante satisfecho/a		2	Sí	Varios días	Ningún día	Ningún día	Ningún día	Ningún día	Ningún día	Varios días	No	No	No	No	No	No
115	1	26	Femenino	Soltero/a	No	No	0	No	8.1	No	No	Sí	10	Sí	10	Sueldo		Máster	Otra	Sí		Sí	No		No	Otros compañer@s de otras titulaciones	No	Sí	Ciudad	Bastante satisfecho/a	1	Bastante	Muy satisfecho/a		8	Sí	Varios días	Ningún día	Varios días	Varios días	Ningún día	Varios días	Ningún día	Sí	No	No	Sí	Sí	Sí
116	1	19	Masculino	Soltero/a	No	No		No	8.12	No	No	No		No		Vocación		Bachillerato	Selectividad	No	6	No	No		No	Otros compañer@s de otras titulaciones	Sí	Sí	Ciudad	Satisfecho/a	3	Bastante	Satisfecho/a		6	Sí	Varios días	Varios días	Más de la mitad de los días	Varios días	Ningún día	Ningún día	Ningún día	Sí	Sí	No	Sí	Sí	No
117	1	20	Femenino	Soltero/a	No	No		No	0	Sí	Sí	No		No		Vocación	1	Bachillerato	Selectividad	Sí		Sí	No		No	En una residencia	Sí	No	Pueblo	Bastante satisfecho/a		Bastante	Bastante satisfecho/a		8	Sí	Ningún día	Ningún día	Ningún día	Ningún día	Ningún día	Ningún día	Ningún día	No	No	No	No	No	No
118	1	22	Femenino	Soltero/a	Si, aunque no soy practicante	No	0	No	8.16	Sí	Sí	No		No		Vocación		Bachillerato	Formación profesional	Sí		Sí	No		Sí	Otros compañer@s de Enfermería	Sí	Sí	Pueblo	Bastante satisfecho/a		Mucho	Muy satisfecho/a		3	Sí	Varios días	Ningún día	Ningún día	Varios días	Ningún día	Ningún día	Ningún día	Sí	No	No	Sí	Sí	Sí
119	1	20	Femenino	Soltero/a	No	No	0	No	8.75	Sí	Sí	No		No		Vocación		Bachillerato	Selectividad	No	6	No	No		Sí	Mi nucleo familiar (padres, hermanos, etc)	Sí	No	Ciudad	Bastante satisfecho/a	4	Bastante	Bastante satisfecho/a		8	Sí	Más de la mitad de los días	Más de la mitad de los días	Casi todos los días	Varios días	Varios días	Más de la mitad de los días	Ningún día	Sí	Sí	No	Sí	No	Sí
120	1	19	Masculino	Soltero/a	Si, aunque no soy practicante	No	0	No	8	Sí	No	No		No		Salidas profesionales		Bachillerato	Selectividad	No	6	No	No		No	Mi nucleo familiar (padres, hermanos, etc)	Sí	No	Pueblo	Satisfecho/a	4	Lo sufiente	Muy satisfecho/a		4	Sí	Varios días	Varios días	Varios días	Más de la mitad de los días	Varios días	Casi todos los días	Más de la mitad de los días	Sí	No	Sí	Sí	No	No
121	1	19	Femenino	Soltero/a	Si, aunque no soy practicante	No	0	No	7.87	No	Sí	No		No		No puede estudiar lo que queria		Bachillerato	Selectividad	Sí		Sí	Sí	1	No	Mi nucleo familiar (padres, hermanos, etc)	Sí	Sí	Ciudad	Satisfecho/a	5	Bastante	Bastante satisfecho/a		9	Sí	Ningún día	Ningún día	Ningún día	Ningún día	Ningún día	Ningún día	Ningún día	No	No	No	No	No	No
122	1	19	Femenino	Otro	No	No	0	No	6.64	Sí	No	No		No		Otro: (especificar)	4	Bachillerato	Selectividad	No	4.6	Sí	No		Sí	Mi nucleo familiar (padres, hermanos, etc)	Sí	Sí	Ciudad	Bastante satisfecho/a	4	Bastante	Satisfecho/a		8	Sí	Casi todos los días	Casi todos los días	Casi todos los días	Más de la mitad de los días	Ningún día	Varios días	Casi todos los días	Sí	Sí	No	Sí	No	Sí
123	1	21	Femenino	Soltero/a	Si, soy practicante	No	0	No	7.42	Sí	Sí	No		No		Vocación	1	Bachillerato	Formación profesional	No	6, 7	Sí	No		Sí	Otros compañer@s de otras titulaciones	No	No	Ciudad	Bastante satisfecho/a	1	Bastante	Bastante satisfecho/a			Sí	Varios días	Varios días	Más de la mitad de los días	Varios días	Varios días	Varios días	Varios días	Sí	Sí	No	Sí	No	Sí
124	1	22	Femenino	Soltero/a	Si, aunque no soy practicante	No	0	No	7	Sí	Sí	No		No		Vocación		Bachillerato	Formación profesional	No	1,4,5,6	No	No		No	Mi nucleo familiar (padres, hermanos, etc)	Sí	No	Ciudad	Satisfecho/a	1	Lo sufiente	Satisfecho/a		2	No	Ningún día	Ningún día	Ningún día	Ningún día	Ningún día	Varios días	Varios días	No	No	No	No	Sí	Sí
125	1	19	Masculino	Soltero/a	Si, aunque no soy practicante	No	0	No	8	Sí	Sí	No		No		Salidas profesionales		Bachillerato	Selectividad	No	4,5,6,7	No	No		No	Mi nucleo familiar (padres, hermanos, etc)	Sí	Sí	Pueblo	Satisfecho/a	2	Bastante	Satisfecho/a		2	Sí	Ningún día	Ningún día	Varios días	Varios días	Ningún día	Ningún día	Varios días	No	No	No	No	Sí	No
126	1	19	Femenino	Soltero/a	Si, aunque no soy practicante	No	0	No	8.12	No	Sí	No		No		No puede estudiar lo que queria		Bachillerato	Selectividad	Sí		Sí	No		No	Mi nucleo familiar (padres, hermanos, etc)	Sí	Sí	Ciudad	Bastante satisfecho/a	7	Bastante	Bastante satisfecho/a		6	Sí	Ningún día	Ningún día	Ningún día	Ningún día	Ningún día	Ningún día	Ningún día	Sí	No	No	No	No	No
127	1	20	Femenino	Soltero/a	No	No	0	No	7.5	No	Sí	No		No		Salidas profesionales		Bachillerato	Selectividad	Sí		No	No		Sí	Otros compañer@s de Enfermería	No	No	Pueblo	Satisfecho/a	1	Bastante	Satisfecho/a		7	Sí	Varios días	Varios días	Varios días	Más de la mitad de los días	Varios días	Ningún día	Varios días	No	Sí	No	Sí	No	Sí
128	1	22	Masculino	Soltero/a	Si, aunque no soy practicante	No	0	No	8	Sí	No	No		No		Salidas profesionales		Bachillerato	Formación profesional	No	6.8	Sí	No		No	Otros compañer@s de Enfermería	No	Sí	Pueblo	Bastante satisfecho/a		Bastante	Bastante satisfecho/a		2	Sí	Varios días	Ningún día	Ningún día	Ningún día	Ningún día	Varios días	Varios días	Sí	No	No	No	No	No
129	1	19	Femenino	Otro	Si, aunque no soy practicante	No		No	9	Sí	Sí	No		No		Vocación		Bachillerato	Selectividad	Sí		Sí	No		Sí	Otros compañer@s de otras titulaciones	Sí	Sí	Pueblo	Muy satisfecho/a		Mucho	Muy satisfecho/a			Sí	Varios días	Ningún día	Varios días	Ningún día	Ningún día	Varios días	Varios días	Sí	Sí	No	No	Sí	No
130	1	29	Femenino	Soltero/a	Si, aunque no soy practicante	Sí	1	Sí	7	Sí	Sí	No		No		Vocación		Bachillerato	Prueba de acceso	No	4,5,6	No	No		Sí	Mi hijo	Sí	No	Ciudad	Satisfecho/a	4	Bastante	Satisfecho/a		2	Sí	Varios días	Ningún día	Varios días	Ningún día	Ningún día	Ningún día	Ningún día	No	Sí	No	No	No	Sí
131	1	20	No binario	Soltero/a	No	No	0	No	8	No	No	No		No		No puede estudiar lo que queria		Bachillerato	Selectividad	Sí		No	No		Sí	Mi nucleo familiar (padres, hermanos, etc)	No	Sí	Ciudad	Bastante satisfecho/a	4	Bastante	Bastante satisfecho/a			Sí	Casi todos los días	Más de la mitad de los días	Más de la mitad de los días	Casi todos los días	Casi todos los días	Varios días	Casi todos los días	Sí	Sí	No	Sí	Sí	No
132	1	19	Femenino	Soltero/a	Si, soy practicante	No		No	8.83	Sí	Sí	No		No		Salidas profesionales		Bachillerato	Selectividad	Sí		No	No		No	Mi nucleo familiar (padres, hermanos, etc)	No	No	Pueblo	Bastante satisfecho/a	1	Bastante	Bastante satisfecho/a		2	Sí	Más de la mitad de los días	Ningún día	Varios días	Varios días	Varios días	Varios días	Varios días	Sí	Sí	Sí	Sí	No	No
133	1	30	Femenino	Soltero/a	No	Sí		No	7	Sí	Sí	No		No		Salidas profesionales		Bachillerato	Prueba de acceso	No	4,5,6	Sí	No		Sí	Mi nucleo familiar (padres, hermanos, etc)	No	Sí	Ciudad	Bastante satisfecho/a		Bastante	Bastante satisfecho/a		1	Sí	Ningún día	Ningún día	Ningún día	Ningún día	Ningún día	Ningún día	Ningún día	No	No	No	No	No	No
134	1	51	Masculino	Casado/a	Si, aunque no soy practicante	Sí	2	Sí	6.27	Sí	No	Sí	6	Sí		Vocación		Estudios primarios	Prueba de acceso	No	1,8,6	No	Sí	8	No	Mujer e hijos	Sí	No	Pueblo	Bastante satisfecho/a		Mucho	Muy satisfecho/a			Sí	Ningún día	Ningún día	Varios días	Ningún día	Ningún día	Ningún día	Ningún día	Sí	No	No	No	No	No
135	1	20	Femenino	Soltero/a	Si, aunque no soy practicante	No	0	No	7.11	Sí	No	No		No		Vocación		Bachillerato	Selectividad	No	4,5,6,8	No	No		Sí	Mi nucleo familiar (padres, hermanos, etc)	Sí	No	Ciudad	Satisfecho/a	7	Bastante	Satisfecho/a			No	Más de la mitad de los días	Varios días	Casi todos los días	Varios días	Varios días	Casi todos los días	Varios días	Sí	Sí	Sí	Sí	Sí	Sí
136	1	19	Femenino	Otro	Si, aunque no soy practicante	No	0	No	7.54	Sí	No	No		No		Vocación		Bachillerato	Selectividad	No	4,5,6	No	No		Sí	Mixto (compañer@s de titulación y de otras ramas)	No	No	Pueblo	Bastante satisfecho/a	6	Bastante	Satisfecho/a		5	Sí	Varios días	Ningún día	Más de la mitad de los días	Ningún día	Ningún día	Varios días	Más de la mitad de los días	No	Sí	No	No	No	No
137	1	21	Femenino	Soltero/a	Si, aunque no soy practicante	No		No	8.02	Sí	Sí	No		No		Vocación		Bachillerato	Formación profesional	No	6	No	No		Sí	Otros compañer@s de otras titulaciones	No	No	Ciudad	Bastante satisfecho/a	1	Bastante	Bastante satisfecho/a		2	Sí	Varios días	Ningún día	Más de la mitad de los días	Más de la mitad de los días	Varios días	Varios días	Ningún día	No	No	No	Sí	Sí	Sí
138	1	21	Femenino	Soltero/a	Si, soy practicante	No	0	No	8.06	Sí	Sí	No		No		Vocación		Bachillerato	Formación profesional	No	4	Sí	No		Sí	Mixto (compañer@s de titulación y de otras ramas)	No	Sí	Pueblo	Satisfecho/a	1	Mucho	Bastante satisfecho/a		5	Sí	Más de la mitad de los días	Ningún día	Más de la mitad de los días	Varios días	Ningún día	Casi todos los días	Varios días	Sí	No	Sí	No	Sí	Sí
139	1	19	Femenino	Soltero/a	Si, soy practicante	No		No	8.7	Sí	Sí	No		No		Vocación		Bachillerato	Selectividad	No	6	Sí	No		Sí	Mi nucleo familiar (padres, hermanos, etc)	Sí	Sí	Ciudad	Bastante satisfecho/a		Bastante	Bastante satisfecho/a		8	Sí	Varios días	Ningún día	Más de la mitad de los días	Ningún día	Ningún día	Casi todos los días	Varios días	Sí	Sí	Sí	No	No	Sí
140	1	20	Femenino	Soltero/a	No	No		No	8	Sí	No	No		No		Vocación		Bachillerato	Selectividad	No	6	No	No		No	Otros compañer@s de Enfermería	Sí	No	Pueblo	Bastante satisfecho/a	1	Bastante	Bastante satisfecho/a		8	Sí	Varios días	Ningún día	Varios días	Ningún día	Ningún día	Varios días	Varios días	No	Sí	Sí	Sí	No	Sí
141	1	27	Masculino	Otro	No	No	0	Sí	7	No	Sí	No		No		Vocación		Bachillerato	Prueba de acceso	No	6	Sí	No		Sí	Mi nucleo familiar (padres, hermanos, etc)	Sí	Sí	Ciudad	Bastante satisfecho/a	7	Bastante	Bastante satisfecho/a		5	Sí	Más de la mitad de los días	Ningún día	Varios días	Varios días	Ningún día	Ningún día	Ningún día	No	No	No	No	No	No
142	1	20	Femenino	Soltero/a	No	No	0	No	8.17	Sí	Sí	No		No		Vocación		Bachillerato	Selectividad	Sí		Sí	No		No	Otros compañer@s de otras titulaciones	Sí	Sí	Ciudad	Bastante satisfecho/a	3	Mucho	Muy satisfecho/a			Sí	Varios días	Ningún día	Ningún día	Ningún día	Ningún día	Ningún día	Ningún día	No	No	No	No	No	No
143	1	21	Femenino	Soltero/a	Si, aunque no soy practicante	No		No	7.95	Sí	Sí	No		No		Vocación		Bachillerato	Formación profesional	No	6	Sí	No		Sí	Mi nucleo familiar (padres, hermanos, etc)	No	No	Pueblo	Bastante satisfecho/a	3	Lo sufiente	Satisfecho/a		2	Sí	Varios días	Varios días	Más de la mitad de los días	Varios días	Varios días	Varios días	Varios días	Sí	Sí	Sí	No	Sí	No
144	1	19	Femenino	Soltero/a	Si, aunque no soy practicante	No	0	No	7	No	Sí	No		No		Vocación		Bachillerato	Selectividad	No	4.6	No	Sí	7	Sí	Otros compañer@s de otras titulaciones	No	Sí	Pueblo	Poco satisfecho/a	7	Bastante	Satisfecho/a			Sí	Casi todos los días	Casi todos los días	Casi todos los días	Casi todos los días	Casi todos los días	Más de la mitad de los días	Casi todos los días	Sí, No	Sí	Sí	Sí	Sí	Sí
145	1	19	Femenino	Soltero/a	Si, aunque no soy practicante	No		No	7.71	Sí	No	No		No		Otro: (especificar)	1	Bachillerato	Selectividad	No	6	Sí	No		Sí	Compañeros de enfermería y otras titulaciones	Sí	No	Ciudad	Satisfecho/a	4	Bastante	Bastante satisfecho/a		2	Sí	Varios días	Varios días	Varios días	Varios días	Ningún día	Varios días	Varios días	Sí	Sí	Sí	Sí	No	No
146	1	19	Femenino	Otro	No	No	0	No	8	No	No	No		No		Salidas profesionales		Bachillerato	Selectividad	No	6.8	Sí	No		No	Mi nucleo familiar (padres, hermanos, etc)	Sí	No	Ciudad	Satisfecho/a	6	Bastante	Bastante satisfecho/a		5	Sí	Ningún día	Ningún día	Ningún día, Varios días	Varios días	Ningún día	Varios días	Ningún día	Sí	No	Sí	Sí	Sí	Sí
147	1	22	Femenino	Soltero/a	No	No		No	8.25	Sí	No	Sí	1	No		Vocación		Bachillerato	Formación profesional	No	6	No	No		No	Mi nucleo familiar (padres, hermanos, etc)	Sí	No	Pueblo	Bastante satisfecho/a	2	Mucho	Muy satisfecho/a			Sí	Varios días	Varios días	Varios días	Ningún día	Ningún día	Ningún día	Varios días	Sí	No	No	No	Sí	No
148	1	19	Femenino	Soltero/a	Si, aunque no soy practicante	No		No	7.58	Sí	Sí	No		No		Vocación		Bachillerato	Selectividad	No	4.6	No	No		Sí	Colegio Mayor	Sí	No	Ciudad	Bastante satisfecho/a		Mucho	Muy satisfecho/a		2	Sí	Varios días	Ningún día	Varios días	Ningún día	Ningún día	Ningún día, Varios días	Ningún día	Sí	No	No	No	No	No
149	1	19	Femenino	Otro	Si, soy practicante	No	0	No	6	Sí	No	No		No		Otro: (especificar)	5	Bachillerato	Selectividad	No	1,4,5,8	No	No		Sí	Mi nucleo familiar (padres, hermanos, etc)	Sí	Sí	Ciudad	Satisfecho/a	7	Bastante	Bastante satisfecho/a			No	Varios días	Varios días	Más de la mitad de los días	Más de la mitad de los días	Ningún día	Más de la mitad de los días	Ningún día	Sí	Sí	Sí	Sí	No	Sí
150	1	20	Masculino	Soltero/a	Si, aunque no soy practicante	No	0	No	7.64	No	No	No		No		No puede estudiar lo que queria		Bachillerato	Selectividad	No	4.6	Sí	No		No	Otros compañer@s de otras titulaciones	No	No	Pueblo	Satisfecho/a		Lo sufiente	Satisfecho/a		2	Sí	Ningún día	Ningún día	Ningún día	Varios días	Ningún día	Varios días	Más de la mitad de los días	No	No	Sí	No	Sí	No
151	1	19	Femenino	Soltero/a	Si, aunque no soy practicante	No	0	No	8.11	No	No	No		No		Salidas profesionales		Bachillerato	Selectividad	No	4,5,6	No	No		Sí	Mi nucleo familiar (padres, hermanos, etc)	No	Sí	Ciudad	Satisfecho/a	5	Bastante	Bastante satisfecho/a		2	Sí	Más de la mitad de los días	Varios días	Más de la mitad de los días	Más de la mitad de los días	Varios días	Más de la mitad de los días	Más de la mitad de los días	Sí	Sí	Sí	Sí	Sí	Sí
152	1	20	Femenino	Soltero/a	Si, aunque no soy practicante	No	0	No	8.68	Sí	Sí	No		No		Vocación		Bachillerato	Selectividad	Sí		No	No		Sí	Mi nucleo familiar (padres, hermanos, etc)	Sí	No	Pueblo	Bastante satisfecho/a	1	Bastante	Bastante satisfecho/a		7	Sí	Varios días	Ningún día	Varios días	Varios días	Varios días	Varios días	Varios días	Sí	No	Sí	No	Sí	No
153	1	21	Femenino	Soltero/a	Si, soy practicante	No	0	No	8.5	Sí	No	No		No		Vocación		Bachillerato	Selectividad	Sí		No	Sí	7	Sí	Otros compañer@s de Enfermería	Sí	Sí	Pueblo	Bastante satisfecho/a	1	Bastante	Satisfecho/a		7	Sí	Más de la mitad de los días	Varios días	Varios días	Más de la mitad de los días	Casi todos los días	Casi todos los días	Varios días	Sí	Sí	Sí	Sí	Sí	No
154	1	23	Femenino	Soltero/a	Si, aunque no soy practicante	No	0	No	6	Sí	No	No		Sí	1	Vocación		Bachillerato	Formación profesional	No	3.4.5.6	No	No		No	Mis compañer@s no son universitarios	Sí	No	Ciudad	Muy satisfecho/a		Mucho	Muy satisfecho/a			Sí	Varios días	Ningún día	Ningún día	Ningún día	Ningún día	Ningún día	Ningún día	No	No	No	No	No	No
155	1	19	Femenino	Soltero/a	No	No		No	8.16	Sí	Sí	No		No		Otro: (especificar)	4	Bachillerato	Selectividad	No	4.5	No	No		No	Mi nucleo familiar (padres, hermanos, etc)	No	Sí	Pueblo	Satisfecho/a	1	Bastante	Bastante satisfecho/a		2	Sí	Más de la mitad de los días	Más de la mitad de los días	Más de la mitad de los días	Más de la mitad de los días	Varios días	Varios días	Más de la mitad de los días	Sí	Sí	Sí	Sí	Sí	Sí
156	1	46	Femenino	Casado/a	Si, aunque no soy practicante	Sí	2	Sí	7.8	Sí	Sí	No		No		Vocación		Secundaria	Prueba de acceso	No	4.6	No	No		No	Mi nucleo familiar (padres, hermanos, etc)	Sí	No	Ciudad	Satisfecho/a	1	Bastante	Satisfecho/a		2	Sí	Ningún día	Casi todos los días	Varios días	Varios días	Ningún día	Varios días	Ningún día	Sí	No	No	No	No	Sí
157	1	55	Femenino	Divorciado/a	Si, soy practicante	Sí	2	Sí	7.5	Sí	Sí	Sí	3	Sí	3	Vocación	6	Bachillerato	Prueba de acceso	No	4.5	No	Sí	6	Sí	Mi nucleo familiar (padres, hermanos, etc)	No	No	Ciudad	Satisfecho/a	4	Lo sufiente	Bastante satisfecho/a		2	Sí	Más de la mitad de los días	Varios días	Varios días	Varios días	Ningún día	Varios días	Varios días	Sí	Sí	Sí	No	No	No
158	1	20	Femenino	Soltero/a	Si, soy practicante	No	0	No	8.75	Sí	Sí	No		No		Vocación	1	Bachillerato	Selectividad	No	6	Sí	No		Sí	Mixto (compañer@s de titulación y de otras ramas)	Sí	Sí	Pueblo	Satisfecho/a	5	Bastante	Bastante satisfecho/a			Sí	Varios días	Varios días	Varios días	Varios días	Varios días	Varios días	Varios días	Sí	Sí	Sí	Sí	Sí	No
159	1	21	Femenino	Soltero/a	No	No	0	No	8.3	No	Sí	No		No		No puede estudiar lo que queria		Bachillerato	Selectividad	No	6	Sí	No		Sí	Mi nucleo familiar (padres, hermanos, etc)	Sí	Sí	Ciudad	Poco satisfecho/a	4	Poco	Satisfecho/a		9	No	Más de la mitad de los días	Más de la mitad de los días	Más de la mitad de los días	Más de la mitad de los días	Varios días	Casi todos los días	Ningún día	Sí	Sí	Sí	Sí	Sí	No
160	1	19	Femenino	Soltero/a	Si, aunque no soy practicante	No		No	8	Sí	Sí	No		No		Salidas profesionales	1	Bachillerato	Selectividad	No	8	No	No		Sí	Mixto (compañer@s de titulación y de otras ramas)	Sí	No	Pueblo	Satisfecho/a	1	Bastante	Bastante satisfecho/a		8	Sí	Varios días	Ningún día	Ningún día	Varios días	Varios días	Varios días	Varios días	Sí	Sí	No	Sí	No	No
161	1	21	Femenino	Soltero/a	No	No	0	No	0	Sí	No	No		No		Vocación	1	Bachillerato	Selectividad	No	6	No	Sí	7	No	Otros compañer@s de otras titulaciones	Sí	Sí	Pueblo	Bastante satisfecho/a	6	Mucho	Satisfecho/a			Sí	Varios días	Ningún día	Ningún día	Varios días	Ningún día	Más de la mitad de los días	Ningún día	No	No	Sí	Sí	Sí	No
162	1	19	Masculino	Soltero/a	No	No	0	No	7.9	Sí	No	No		No		Salidas profesionales		Bachillerato	Selectividad	No	4	Sí	No		No	Mi nucleo familiar (padres, hermanos, etc)	No	Sí	Ciudad	Satisfecho/a	4	Bastante	Bastante satisfecho/a		8	Sí	Ningún día	Ningún día	Ningún día	Ningún día	Ningún día	Ningún día	Ningún día	No	No	No	No	Sí	No
163	1	20	Femenino	Soltero/a	Si, aunque no soy practicante	No		No	7	Sí	No	No		No		Vocación		Bachillerato	Selectividad	Sí		Sí	No		No	Otros compañer@s de otras titulaciones	Sí	No	Ciudad	Muy satisfecho/a	3	Mucho	Muy satisfecho/a		2	Sí	Varios días	Ningún día	Ningún día	Varios días	Ningún día	Varios días	Ningún día	Sí	No	No	Sí	Sí	No
164	1	21	Masculino	Soltero/a	Si, aunque no soy practicante	No	0	No	7	Sí	Sí	Sí	3	Sí	3	Vocación	1	Secundaria	Selectividad	No	4.6	No	No		No	Otros compañer@s de Enfermería	No	Sí	Pueblo	Bastante satisfecho/a	1	Bastante	Muy satisfecho/a			Sí	Ningún día	Ningún día	Ningún día	Ningún día	Más de la mitad de los días	Ningún día	Ningún día	No	No	No	No	No	No
165	1	19	Femenino	Soltero/a	Si, aunque no soy practicante	No		No	6.33	No	No	No	3	No		Vocación		Bachillerato	Selectividad	Sí		Sí	No		No	Mi nucleo familiar (padres, hermanos, etc)	No	Sí	Ciudad	Poco satisfecho/a	1	Mucho	Muy satisfecho/a			Sí	Varios días	Ningún día, Varios días	Ningún día	Ningún día, Varios días	Ningún día	Ningún día	Ningún día	Sí	No	No	No	No	No
166	1	20	Masculino	Soltero/a	Si, aunque no soy practicante	No	0	No	9.33	No	Sí	No		No		Salidas profesionales		Bachillerato	Selectividad	No		No	No		Sí	Otros compañer@s de otras titulaciones	No	No	Ciudad	Bastante satisfecho/a	4	Bastante	Bastante satisfecho/a		5	No	Más de la mitad de los días	Casi todos los días	Más de la mitad de los días	Más de la mitad de los días	Varios días	Varios días	Varios días	Sí	Sí	No	Sí	Sí	No
167	1	21	Femenino	Soltero/a	Si, aunque no soy practicante	No		No	7.4	Sí	Sí	No		No		Vocación		Bachillerato	Formación profesional	No	4.5	No	Sí	10	Sí	Otros compañer@s de otras titulaciones	No	No	Pueblo	Satisfecho/a	1	Mucho	Satisfecho/a		7	Sí	Varios días	Ningún día	Más de la mitad de los días	Varios días	Ningún día	Varios días	Varios días	Sí	Sí	No	No	Sí	Sí
168	1	22	Femenino	Soltero/a	No	No		No	8.18	Sí	Sí	Sí	5	No		Vocación		Bachillerato	Formación profesional	Sí		Sí	No		Sí	Mi nucleo familiar (padres, hermanos, etc)	Sí	Sí	Pueblo	Bastante satisfecho/a	1	Bastante	Bastante satisfecho/a		5	Sí	Varios días	Varios días	Más de la mitad de los días	Más de la mitad de los días	Varios días	Varios días	Ningún día, Varios días	Sí	Sí	Sí	Sí	Sí	Sí
169	1	19	Femenino	Soltero/a	Si, aunque no soy practicante	No	0	No	8	Sí	Sí	No		No		Vocación		Bachillerato	Selectividad	No	6	Sí	No		No	Otros compañer@s de Enfermería	No	Sí	Pueblo	Satisfecho/a	3	Lo sufiente	Satisfecho/a		5	Sí	Ningún día	Ningún día	Ningún día	Ningún día	Ningún día	Ningún día	Ningún día	No	Sí, No	No	No	No	No
170	1	24	Femenino	Soltero/a	Si, aunque no soy practicante	No	0	No	7.8	Sí	Sí	No		Sí	1	Vocación		Secundaria	Formación profesional	No	4,5,6,8	No	No		Sí	Otros compañer@s de otras titulaciones	No	No	Ciudad	Satisfecho/a	1	Bastante	Satisfecho/a		2	Sí	Ningún día	Ningún día	Casi todos los días	Más de la mitad de los días	Varios días	Ningún día	Ningún día	No	No	No	Sí	Sí	Sí
[truncated: 4 more columns]
