# Supplementary material for: Validation of General Anxiety Disorder (GAD-7) questionnaire in Spanish nursing students
Source: PeerJ. 2022 Nov 1;10:e14296. doi: 10.7717/peerj.14296 (PMC9635356; doi:10.7717/peerj.14296)
Supplement: Supplemental Information 2 [file peerj-10-14296-s002.xlsx]

## Sheet: Respuestas de formulario 1
NID	Group	Age	Sex	Marital status	Religious status	Childs	If answered yes, say how many	Currently working	Mean nursing grade (so far)	Was nursing your first option?	Have you got an scholarship?	Have you got previous experience? (No Other clinical practices, just professional experience)	If answered yes, which kind of experience? (p.e.: Healthcare assitant, x-ray, psychology, etc.)	Any previous experiences as clinical practices?	If answered yes, say which area of expertise	Why choose nursing?	Other	Which studies level prior to start nursing you had?	How entered nursing?	Subjects left to recover	If there are some, say which ones	Any activity that you do to help with relaxation? (draw, paint, sing, yoga, etc.,)	Have you got any chronic ilness?	If answered yes, say which one	Have you ever suffered from anxiety crisis?	Do you live with someone during the academic course?	Have you ever been infected with covid-19?	Do you practise any sport (regular basis)?	Your familiar residence is in a town or a city?	Satisfied with your nursing teaching staff?	What the lectures should improve?	Is nursing fullfiling your expectations (so far)?	In general, are you satisfied with the university (resources, schedule, etc.)	If you answered not at all, or not much say why	What would you change? (buildings, schedules, material, contents, etc.)	Do you feel passionate about finishing the nursing degree?	Over the last 2 weeks, how often have you beenbothered by the following problems? Mark only one option per item: Feeling nervous, anxious or on edge	Over the last 2 weeks, how often have you beenbothered by the following problems? Mark only one option per item: Not being able to stop or control worrying	Over the last 2 weeks, how often have you beenbothered by the following problems? Mark only one option per item: Worrying too much about different things	Over the last 2 weeks, how often have you beenbothered by the following problems? Mark only one option per item: Trouble relaxing	Over the last 2 weeks, how often have you beenbothered by the following problems? Mark only one option per item: Being so restless that it is hard to sit still	Over the last 2 weeks, how often have you beenbothered by the following problems? Mark only one option per item: Becoming easily annoyed or irritable	Over the last 2 weeks, how often have you beenbothered by the following problems? Mark only one option per item: Feeling afraid as if something awful might happen	Reflect on whether any of the symptoms listed have occurred in the past two weeks. Check only the box that most closely matches each row. Have you felt keyed up or on edge?	Reflect on whether any of the symptoms listed have occurred in the past two weeks. Check only the box that most closely matches each row. Have you been worrying a lot?	Reflect on whether any of the symptoms listed have occurred in the past two weeks. Check only the box that most closely matches each row. Have you been irritable?	Reflect on whether any of the symptoms listed have occurred in the past two weeks. Check only the box that most closely matches each row. Have you had difficulty relaxing?	Reflect on whether any of the symptoms listed have occurred in the past two weeks. Check only the box that most closely matches each row. Have you been sleeping poorly?	Reflect on whether any of the symptoms listed have occurred in the past two weeks. Check only the box that most closely matches each row. Have you had headaches or neckaches?
1	0	32	Female	Married	No	No	0	Yes	8.4	Yes	Yes	No		No		International oportunities		University	University access exam	Yes		Yes	No		No	husband	Yes	Yes	City	Extremely satisfied	1	Quite	Extremely satisfied		1	Yes	Several days	Not at all	Not at all	Not at all	Not at all	Not at all	Not at all	Yes	No	No	No	No	No
2	0	21	Female	Single	Yes, but not practicant	No	0	No	8.23	Yes	Yes	No		Yes	8	Vocational		High school	Professional job role formation	No	1	Yes	Yes	1	No	Family	Yes	No	City	Satisfied	2	Quite	Extremely satisfied		2	Yes	More than half the days	Nearly every day	More than half the days	Nearly every day	Several days	Several days	Several days	Yes	Yes	Yes	Yes	Yes	Yes
3	0	20	Female	Other	Yes, practicant	No	0	No	9	Yes	No	No		Yes	1	Vocational	1	High school	Professional job role formation	Yes		Yes	No		Yes	Family	No	Yes	City	Extremely satisfied	3	Quite	Very Satisfied		2	Yes	Nearly every day	More than half the days	More than half the days	More than half the days	More than half the days	Several days	Not at all	Yes	Yes	No	Yes	No	Yes
4	0	20	Female	Single	Yes, but not practicant	No	0	No	8.04	Yes	No	No		Yes	1	Vocational		High school	Professional job role formation	Yes		No	No		Yes	Colleagues from other degrees	Yes	No	Town	Satisfied	2	Quite	Extremely satisfied		2	Yes	Several days	Not at all	Several days	Several days	Several days	Not at all	Not at all	Yes	Yes	No	Yes	Yes	Yes
5	0	21	Female	Single	Yes, practicant	No	0	No	8.9	Yes	Yes	Yes	4	No		Vocational		High school	Professional job role formation	No	1	Yes	No		Yes	Family	Yes	Yes	Town	Satisfied	2	Quite	Satisfied		2	Yes	Several days	Several days	Several days	More than half the days	Several days	Several days	Several days	Yes	Yes	Yes	Yes	Yes	No
6	0	18	Female	Single	Yes, practicant	No	0	No	0	Yes	No	No		No		Professional oportunities		High school	University access exam	No	1	No	No		Yes	Colleagues from other degrees	No	No	Town	Extremely satisfied	3	Quite	Extremely satisfied		2	Yes	Nearly every day	Several days	More than half the days	Several days	Nearly every day	Nearly every day	Nearly every day	Yes	Yes	Yes	Yes	Yes	No
7	0	19	Female	Single	Yes, practicant	No	0	No	8	Yes	No	No		No		Vocational	1	High school	University access exam	Yes		Yes	No		No	Family	No	No	City	Satisfied	2	Enough	Satisfied		2	Yes	Several days	Nearly every day	Nearly every day	Several days	Several days	More than half the days	Nearly every day	Yes	Yes	Yes	Yes	Yes	Yes
8	0	18	Female	Single	No	No	0	No	6.9	Yes	No	No		No		Vocational	1	High school	University access exam	No	1	Yes	No		Yes	Colleagues from other degrees	Yes	Yes	City	Extremely satisfied	2	Quite	Very Satisfied		3	Yes	Nearly every day	More than half the days	Nearly every day	Several days	Several days	More than half the days	Nearly every day	Yes	Yes	No	Yes	No	Yes
9	0	19	Female	Single	Yes, practicant	No	0	No	8.5	No	No	No		No		First option not available		High school	University access exam	Yes		No	No		Yes	Colleagues from other degrees	Yes	Yes	Town	Satisfied	3	Quite	Very Satisfied		2	No	Several days	Several days	More than half the days	More than half the days	Nearly every day	More than half the days	More than half the days	Yes	Yes	No	Yes	Yes	No
10	0	18	Female	Single	No	No	0	No	8.3	Yes	No	No		No		Vocational		High school	University access exam	Yes		Yes	No		Yes	Other nursing students and from other degrees	No	No	Town	Extremely satisfied	3	A lot	Extremely satisfied		2	Yes	More than half the days	Several days	Nearly every day	More than half the days	Several days	Several days	Not at all, Several days	Yes	Yes	Yes	Yes	Yes	Yes
11	0	21	Female	Single	Yes, but not practicant	No	0	No	9.3	Yes	Yes	Yes	2	No		Vocational	1	High school	Professional job role formation	Yes		Yes	No		Yes	Family	No	No	City	Satisfied	4	Enough	Not much Satisfied	1	3	Yes	Several days	Several days	More than half the days	Several days	Several days	Several days	Not at all	Yes	Yes	Yes	Yes	Yes	Yes
12	0	19	Female	Single	No	No	0	No	9	Yes	No	No		No		Vocational		High school	University access exam	Yes		No	No		Yes	Other nursing students	Yes	No	City	Extremely satisfied	2	Enough	Very Satisfied		3	No	Nearly every day	Several days	Nearly every day	Several days	Not at all	Not at all	More than half the days	Yes	Yes	Yes	Yes	No	No
13	0	19	Female	Single	No	No	0	No	8.7	Yes	No	No		No		Vocational		High school	University access exam	Yes		Yes	No		Yes	Colleagues from other degrees	Yes	Yes	City	Extremely satisfied	2	Quite	Extremely satisfied		3	Yes	Several days	Several days	Not at all	Nearly every day	Nearly every day	Several days	Not at all	Yes	Yes	Yes	Yes	No	Yes
14	0	18	Female	Single	No	No	0	No	9.75	Yes	Yes	No		No		Vocational		High school	University access exam	No	1	Yes	Yes	1	Yes	Colleagues from other degrees	Yes	Yes	City	Extremely satisfied	1	Enough	Satisfied		2	No	Nearly every day	More than half the days	Nearly every day	More than half the days	Nearly every day	Nearly every day	Nearly every day	Yes	Yes	Yes	Yes	Yes	No
15	0	21	Female	Single	No	No	0	No	8.25	Yes	Yes	Yes	1	Yes	1	Vocational	1	High school	Professional job role formation	Yes		Yes	No		Yes	Colleagues from other degrees	Yes	No	City	Satisfied	2	Quite	Satisfied		3	Yes	Nearly every day	More than half the days	More than half the days	More than half the days	Nearly every day	Several days	More than half the days	Yes	Yes	Yes	Yes	Yes	Yes
16	0	19	Female	Single	Yes, but not practicant	No	0	No	8	No	No	No		No		First option not available		High school	University access exam	Yes		Yes	No		Yes	Colleagues from other degrees	No	Yes	Town	Satisfied	2	Quite	Extremely satisfied	.		Yes	Nearly every day	Nearly every day	Nearly every day	Nearly every day	Nearly every day	Nearly every day	Nearly every day	Yes	Yes	Yes	Yes	Yes	Yes
17	0	29	Female	Single	No	No	0	No	9.85	No	Yes	Yes	3	Yes	3	Vocational		secondary school	Professional job role formation	No	1	No	No		Yes	Couple	No	No	Town	Satisfied		Not much	Not much Satisfied	2	2	No	Several days	Not at all	Several days	Several days	Not at all	Several days	Not at all	No	Yes	No	Yes	Yes	Yes
18	0	19	Female	Single	Yes, but not practicant	No	0	No	9.6	Yes	Yes	No		No		Vocational		High school	University access exam	Yes		No	No		No	Family	Yes	No	City	Extremely satisfied	2	Quite	Satisfied		2	Yes	More than half the days	Several days	More than half the days	More than half the days	Not at all	More than half the days	Not at all	Yes	Yes	Yes	Yes	No	Yes
19	0	21	Female	Single	Yes, practicant	No	0	No	9.79	Yes	No	No		No		Vocational		High school	Professional job role formation	No	1	No	No		Yes	Family	Yes	Yes	Town	Extremely satisfied	2	A lot	Very Satisfied			Yes	Several days	Several days	More than half the days	Several days	Several days	Several days	Several days	Yes	Yes	Yes	Yes	Yes	Yes
20	0	19	Female	Single	Yes, but not practicant	No	0	No	7	Yes	No	No		No		Vocational		High school	University access exam	Yes		Yes	No		Yes	Other nursing students and from other degrees	Yes	No	City	Satisfied	3	Enough	Extremely satisfied		2	Yes	More than half the days	More than half the days	Nearly every day	More than half the days	Several days	Several days	More than half the days	Yes	Yes	Yes	Yes	No	Yes
21	0	18	Female	Single	Yes, but not practicant	No	0	No	9	No	Yes	No		No		First option not available		High school	University access exam	Yes		Yes	No		No	Colleagues from other degrees	No	No	Town	Extremely satisfied	1	Quite	Extremely satisfied		2	Yes	Several days	Several days	Several days	Several days	Not at all	Several days	Several days	Yes	Yes	Yes	Yes	No	Yes
22	0	18	Female	Single	Yes, but not practicant	No	0	No	8	Yes	Yes	No		No		Vocational		High school	University access exam	Yes		Yes	No		Yes	Family	Yes	No	Town	Satisfied	1	Enough	Satisfied		2	Yes	Nearly every day	Nearly every day	Nearly every day	Nearly every day	Nearly every day	Nearly every day	Nearly every day	Yes	Yes	Yes	Yes	Yes	No
23	0	18	Male	Single	Yes, practicant	No	0	No	9.67	No	Yes	No		No		First option not available		High school	University access exam	Yes		Yes	No		Yes	Family	Yes	Yes	City	Extremely satisfied	3	Quite	Very Satisfied		2	Yes	Several days	Not at all	Not at all	Several days	Several days	Several days	Several days	Yes	Yes	Yes	Yes	No	Yes
24	0	18	Female	Single	Yes, practicant	No	0	No	8.4	Yes	No	No		No		Vocational		High school	University access exam	Yes		Yes	No		No	Family	No	Yes	City	Extremely satisfied	1	Quite	Extremely satisfied			Yes	Several days	Not at all	Several days	Not at all	Not at all, Several days	Several days	Several days	Yes	Yes	Yes	Yes	Yes	Yes
25	0	19	Male	Single	No	No	0	No	7	Yes	Yes	No		No		Vocational		High school	University access exam	Yes		Yes	No		No	Colleagues from other degrees	Yes	Yes	City	Satisfied	1	Quite	Very Satisfied		2	Yes	Several days	Several days	Several days	More than half the days	Not at all	Several days	More than half the days	Yes	Yes	Yes	Yes	No	Yes
26	0	21	Female	Single	Yes, but not practicant	No	0	No	9.08	Yes	No	No		Yes		Vocational		High school	Professional job role formation	No	1	No	No		Yes	Colleagues from other degrees	No	No	City	Not much Satisfied	2	Enough	Satisfied		2	Yes	Nearly every day	More than half the days	Nearly every day	Nearly every day	Nearly every day	Nearly every day	Nearly every day	Yes	Yes	Yes	Yes	Yes	Yes
27	0	21	Female	Single	Yes, but not practicant	No	0	No	9.36	Yes	Yes	No		Yes	5	Vocational		High school	Professional job role formation	Yes		Yes	No		Yes	Family	Yes	Yes	Town	Satisfied	2	Quite	Satisfied		2	Yes	Several days	Not at all	More than half the days	Not at all	Not at all	More than half the days	More than half the days	Yes	Yes	Yes	No	Yes	Yes
28	0	19	Female	Single	Yes, practicant	No	0	No	9.81	Yes	Yes	No		No		Vocational		High school	University access exam	No	1	No	No		Yes	Other nursing students and from other degrees	No	No	Town	Satisfied	2	Enough	Satisfied		2	Yes	Nearly every day	More than half the days, Nearly every day	More than half the days	Several days	More than half the days	More than half the days	Nearly every day	Yes	Yes	Yes	Yes	No	No
29	0	21	Female	Single	No	No	0	No	7.52	Yes	Yes	No		Yes	9	Vocational		High school	Professional job role formation	Yes		No	Yes	2	No	Colleagues from other degrees	Yes	No	Town	Extremely satisfied	1	Quite	Extremely satisfied		3	Yes	Several days	Several days	More than half the days	More than half the days	Several days	Not at all	Not at all	Yes	Yes	No	Yes	Yes	Yes
30	0	18	Female	Single	No	No	0	No	9.8	Yes	Yes	No		No		Vocational		High school	University access exam	No	1	Yes	No		Yes	Other nursing students and from other degrees	Yes	Yes	Town	Satisfied	2	Not much	Satisfied		2	No	Nearly every day	More than half the days	Nearly every day	Nearly every day	Nearly every day	Nearly every day	Several days	Yes	Yes	Yes	Yes	No	Yes
31	0	24	Female	Single	No	No	0	No	9.05	Yes	No	No		No		Professional oportunities		University	University access exam	No	1	Yes	No		Yes	Family	No	No	City	Extremely satisfied	2	Quite	Extremely satisfied		3	Yes	Nearly every day	More than half the days	More than half the days	Nearly every day	Nearly every day	More than half the days	Not at all	Yes	Yes	Yes	Yes	Yes	Yes
32	0	19	Male	Single	Yes, but not practicant	No	0	No	9.81	No	Yes	No		No		First option not available		High school	University access exam	Yes		Yes	No		No	Colleagues from other degrees	No	Yes	Town	Satisfied	2	Quite	Satisfied		2	Yes	More than half the days	More than half the days	Several days	Several days	Not at all	Several days	More than half the days	Yes	Yes	Yes	No	No	Yes
33	0	20	Female	Single	Yes, but not practicant	No	0	No	8.98	Yes	Yes	No		No		Vocational		High school	University access exam	No	1	Yes	Yes	3	Yes	Colleagues from other degrees	Yes	No	Town	Satisfied	2	Quite	Extremely satisfied		2	Yes	Several days	Several days	More than half the days	More than half the days	Several days	More than half the days	Several days	Yes	Yes	Yes	Yes	Yes	Yes
34	0	18	Female	Single	Yes, practicant	No	0	No	8.18	Yes	No	No		No		Vocational		High school	University access exam	Yes		No	No		No	Family	No	Yes	Town	Satisfied	1	Enough	Satisfied		3	Yes	Nearly every day	Nearly every day	Nearly every day	Nearly every day	Nearly every day	Nearly every day	More than half the days	Yes	Yes	Yes	Yes	Yes	Yes
35	0	21	Female	Single	Yes, but not practicant	No	0	No	9.53	Yes	Yes	No		Yes	1	Vocational		High school	Professional job role formation	No	1	Yes	No		Yes	Family	Yes	Yes	Town	Extremely satisfied	1	A lot	Satisfied		2	Yes	More than half the days	Several days	Several days	More than half the days	Several days	Several days	Several days	Yes	Yes	Yes	Yes	Yes	Yes
36	0	18	Male	Single	Yes, practicant	No	0	No	9.87	No	No	No		No		First option not available		High school	University access exam	Yes		Yes	No		No	Family	Yes	Yes	City	Extremely satisfied	4	Quite	Extremely satisfied		2	Yes	Several days	Not at all	More than half the days	Not at all	Several days	More than half the days	Not at all	No	Yes	No	No	No	Yes
37	0	18	Female	Single	No	No	0	No	7.52	Yes	Yes	No		No		Vocational		High school	University access exam	No	1	Yes	No		Yes	Other nursing students and from other degrees	No	Yes	City	Satisfied		Quite	Satisfied		2	Yes	Several days	Several days	More than half the days	Nearly every day	Several days	Not at all	Not at all	No	Yes	Yes	Yes	Yes	No
38	0	18	Female	Single	Yes, but not practicant	No	0	No	10	No	Yes	No		No		First option not available		High school	University access exam	Yes		No	No		Yes	Mis compañer@s no son universitarios	No	Yes	Town	Satisfied	2	Quite	Satisfied		2	Yes	Nearly every day	Nearly every day	Nearly every day	Nearly every day	More than half the days	Several days	Several days	Yes	Yes	Yes	Yes	Yes	Yes
39	0	18	Female	Single	No	No	0	No	8.94	Yes	No	No		No		Vocational		High school	University access exam	Yes		Yes	No		Yes	Family	No	Yes	City	Satisfied	3	A lot	Satisfied		4	Yes	Several days	Several days	Not at all	More than half the days	Not at all	Not at all	Not at all	No	No	No	Yes	No	Yes
40	0	19	Female	Single	Yes, but not practicant	No	0	No	8.18	Yes	Yes	No		No		Vocational		High school	University access exam	Yes		Yes	Yes		Yes	No, yo vivo solo/a	Yes	Yes	City	Extremely satisfied	1	Quite	Extremely satisfied		2	Yes	Several days	Several days	Several days	Not at all	Not at all	Not at all	Not at all, Several days	No	Yes	No	No	Yes	Yes
41	0	19	Male	Single	Yes, but not practicant	No	0	No	9.6	Yes	No	No		No		Vocational		High school	University access exam	No	1	Yes	No		No	Other nursing students and from other degrees	Yes	Yes	Town	Satisfied	2	Enough	Satisfied		3	Yes	Nearly every day	Nearly every day	More than half the days	Several days	Nearly every day	Nearly every day	More than half the days	Yes	Yes	Yes	No	No	No
42	0	20	Male	Single	No	No	0	No	9.7	Yes	No	No		Yes	9	Vocational		High school	Professional job role formation	No	1	No	No		Yes	Other nursing students and from other degrees	Yes	No	City	Satisfied	4	Enough	Satisfied	2	3	No	More than half the days	Not at all	More than half the days, Nearly every day	More than half the days, Nearly every day	Several days	More than half the days	Nearly every day	Yes	Yes	Yes	Yes	No	No
43	0	20	Female	Other	Yes, but not practicant	No	0	No	8.2	Yes	Yes	Yes	5	Yes	5	Vocational		High school	Professional job role formation	Yes		No	No		Yes	Colleagues from other degrees	Yes	No	Town	Extremely satisfied	3	Quite	Satisfied		2	Yes	Several days	Not at all	Several days	Several days	Several days	Not at all	Not at all	Yes	Yes	No	Yes	No	No
44	0	20	Male	Single	No	No	0	No	9.55	Yes	Yes	Yes	5	Yes	5	Professional oportunities		High school	Professional job role formation	Yes		Yes	No		Yes	Family	No	Yes	Town	Satisfied		Quite	Extremely satisfied		2	No	Not at all	Not at all	More than half the days	More than half the days	Not at all	Several days	Not at all	No	Yes	Yes	Yes	Yes	Yes
45	0	19	Female	Single	Yes, but not practicant	No	0	No	8.33	Yes	Yes	No		No		Vocational		High school	University access exam	No	1	Yes	No		No	Other nursing students and from other degrees	No	No	Town	Extremely satisfied	2	Quite	Extremely satisfied		2	Yes	Several days	Several days	Not at all	Several days	Not at all	Not at all	Not at all	Yes	Yes	No	Yes	No	No
46	0	19	Female	Single	Yes, practicant	No	0	No	8.6	Yes	No	No		No		Vocational		High school	University access exam	Yes		No	No		Yes	Other nursing students and from other degrees	No	No	City	Extremely satisfied	2	Quite	Extremely satisfied		2	Yes	More than half the days	Not at all	More than half the days	Several days	Not at all	Not at all	Several days	Yes	Yes	No	Yes	No	Yes
47	0	20	Female	Single	Yes, practicant	No	0	No	7.5	Yes	Yes	No		No		Vocational		High school	Professional job role formation	No	1	No	No		Yes	Family	Yes	Yes	City	Satisfied	2	A lot	Very Satisfied		3	Yes	More than half the days	Not at all	Not at all	More than half the days	Not at all	Several days	Several days	Yes	Yes	No	Yes	No	No
48	0	19	Female	Single	No	No	0	No	8.74	No	No	No		No		Other: (specify)	2	High school	University access exam	Yes		No	No		Yes	Family	No	No	City	Satisfied	2	Enough	Satisfied		2	No	Several days	Several days	Several days	Several days	More than half the days	Several days	Not at all	Yes	Yes	Yes	Yes	No	Yes
49	0	18	Female	Single	Yes, but not practicant	No	0	No	10	No	No	No		No		Other: (specify)	3	University	University access exam	Yes		No	No		Yes	Family	No	Yes	City	Satisfied	2	Quite	Satisfied		5	Yes	Not at all	Not at all	Not at all	Not at all	Not at all	Not at all, More than half the days	Not at all	Yes	Yes	No	No	No	No
50	0	20	Female	Single	Yes, but not practicant	No	0	No	9.6	No	No	Yes	1	Yes	1	First option not available		High school	Professional job role formation	No	1	No	No		Yes	Other nursing students	No	No	City	Satisfied	1	Enough	Extremely satisfied		2	No	Several days	Several days	Several days	Several days	Several days	Several days	Several days	Yes	Yes	Yes	Yes	Yes, No	Yes
51	0	21	Female	Single	Yes, but not practicant	No	0	No	9.3	Yes	No	Yes	1	Yes	1	Professional oportunities		High school	Professional job role formation	No	1	No	No		Yes	Family	Yes	No	Town	Satisfied	2	Enough	Extremely satisfied		3	No	More than half the days	Not at all	Several days	Several days	Not at all	Not at all	Not at all, Several days	Yes	Yes	No	No	No	Yes
52	0	28	Female	Single	No	No	0	No	8	Yes	Yes	No		No		Vocational		High school	Access entry (not after high school)	No	1	Yes	No		Yes	Couple	No	No	City	Very Satisfied	2	Quite	Not much Satisfied	2	3	Yes	Several days	Several days	Several days	Several days	Several days	Not at all	Several days	No	No	No	Yes	Yes	Yes
53	0	21	Female	Single	No	No	0	No	9.5	No	Yes	No		Yes	4	Professional oportunities		High school	Professional job role formation	Yes		No	No		No	Family	Yes	Yes	City	Satisfied	3	Quite	Extremely satisfied		5	Yes	Several days	Not at all	Several days	Several days	Not at all	More than half the days	Several days	Yes	Yes	Yes	Yes	No	No
54	0	20	Female	Single	Yes, but not practicant	No	0	No	9.2	Yes	Yes	Yes	5	Yes	5	Professional oportunities		High school	Professional job role formation	Yes		No	Yes	4	No	Family	No	No	Town	Extremely satisfied	2	Quite	Extremely satisfied		5	Yes	More than half the days	Not at all	Several days	Not at all	Several days	Several days	Not at all	Yes	Yes	Yes	No	Yes	No
55	0	18	Female	Single	Yes, but not practicant	No	0	No	9	Yes	Yes	No		No		Professional oportunities		High school	University access exam	Yes		Yes	No		No	Family	No	No	Town	Satisfied	2	Enough	Satisfied		2	Yes	Several days	Not at all	Several days	Not at all	Not at all	Several days	Not at all	No	No	Yes	No	No	Yes
56	0	18	Female	Single	Yes, but not practicant	No	0	No	8	Yes	Yes	No		No		Other: (specify)	1	High school	University access exam	Yes		Yes	Yes	5	No	Family	No	No	Town	Extremely satisfied	2	Quite	Satisfied		4	Yes	Several days	Not at all	Several days	Not at all	Not at all	Several days	Not at all	Yes	Yes	Yes	No	No	No
57	0	18	Male	Other	No	No	0	No	8.1	No	Yes	No		No		First option not available		High school	University access exam	Yes		Yes	No		No	Colleagues from other degrees	No	Yes	Town	Extremely satisfied		Enough	Satisfied			Yes	More than half the days	Several days	Several days	Several days	Not at all	Several days	Several days	Yes	Yes	Yes	Yes	No	No
58	0	18	Female	Single	No	No	0	No	9.95	No	Yes	No		No		Vocational		High school	University access exam	Yes		No	No		Yes	Family	No	No	Town	Satisfied		Quite	Extremely satisfied		2	Yes	Several days	Not at all	Not at all	Not at all	Not at all	Several days	Several days	No	No	Yes	No	Yes, No	Yes
59	0	54	Female	Married	Yes, but not practicant	Yes	3	Yes	7.45	Yes	No	Yes	3	Yes	3	Vocational		secondary school	Access entry (not after high school)	No	1	No	No	.	Yes	Family	Yes	No	Town	Satisfied	2	Quite	Satisfied		2	Yes	Nearly every day	Nearly every day	Nearly every day	Nearly every day	Several days	More than half the days	Not at all	Yes	Yes	Yes	Yes	No	No
60	0	23	Female	Single	Yes, but not practicant	No	0	No	6.27	Yes	Yes	Yes	3	Yes	5	Vocational		High school	Professional job role formation	No	1	Yes	No		Yes	Family	Yes	Yes	City	Satisfied	4	Quite	Extremely satisfied		6	Yes	Several days	Not at all	Several days	Several days	More than half the days	Not at all	Not at all	Yes	Yes, No	No	Yes	No	Yes
61	0	18	Female	Single	No	No	0	No	8.24	No	No	No		No		Vocational		High school	University access exam	Yes		No	No		Yes	Other nursing students and from other degrees	Yes	No	Town	Satisfied	2	Quite	Extremely satisfied		5	Yes	Several days	Not at all	Several days	Not at all	Not at all	Not at all	Not at all	No	No	No	No	Yes	Yes
62	0	42	Male	Married	Yes, but not practicant	Yes	2	Yes	8	Yes	No	Yes	3	Yes	3	Vocational		High school	Access entry (not after high school)	Yes		No	No		Yes	Family	Yes	No	City	Very Satisfied		A lot	Very Satisfied			Yes	Not at all	Not at all	Not at all	Not at all	Not at all	Not at all	Not at all	No	No	No	No	No	No
63	0	34	Female	Single	Yes, practicant	No	0	Yes	8.1	Yes	Yes	Yes	7	No		Vocational	1	High school	University access exam	No	2	No	Yes	6	Yes	Family	Yes	No	City	Not much Satisfied	2	Not much	Satisfied		4	No	Nearly every day	More than half the days	Several days	Nearly every day	Nearly every day	Nearly every day	More than half the days	Yes	Yes	Yes	Yes	Yes	Yes
64	0	20	Female	Single	No	No	0	No	6.88	Yes	Yes	No		No		Vocational		High school	University access exam	No	1	Yes	Yes	1	Yes	Residencia	Yes	Yes	Town	Extremely satisfied		Quite	Extremely satisfied		2	Yes	Several days	Several days	More than half the days	Several days	Several days	Several days	Several days	Yes	Yes	Yes	Yes	No	No
65	0	20	Female	Single	Yes, practicant	No	0	No	9.3	No	No	Yes	1	Yes	1	First option not available		High school	University access exam	Yes		No	No		No	Other nursing students	Yes	Yes	City	Satisfied	1	Enough	Extremely satisfied			Yes	Not at all	Not at all	Not at all	Not at all	Not at all	Not at all	Not at all	No	No	No	Yes	No	Yes
66	0	20	Female	Single	Yes, but not practicant	No	0	No	8	Yes	Yes	No		Yes	4	Vocational		High school	Professional job role formation	Yes		No	No		Yes	Family	Yes	No	City	Extremely satisfied		Quite	Extremely satisfied		2	Yes	More than half the days	Several days	More than half the days	More than half the days	More than half the days	More than half the days	Several days	Yes	Yes	Yes	Yes	Yes	Yes
67	0	19	Female	Single	Yes, practicant	No	0	No	9.16	No	No	No		No		Vocational	3	High school	University access exam	Yes		Yes	No		Yes	Colleagues from other degrees	Yes	Yes	Town	Extremely satisfied	1	A lot	Extremely satisfied		5	Yes	Not at all	Not at all	Not at all	Not at all	Not at all	Several days	Not at all	No	No	No	No	No	No
68	0	20	Female	Single	Yes, practicant	No	0	No	7.5	Yes	Yes	No		No		Vocational		High school	University access exam	Yes		Yes	No		Yes	Colleagues from other degrees	Yes	Yes	City	Satisfied	1	Quite	Extremely satisfied		4	Yes	More than half the days	More than half the days	More than half the days	More than half the days	More than half the days	More than half the days	More than half the days	Yes	Yes	Yes	Yes	Yes	Yes
69	0	19	Female	Single	Yes, but not practicant	No	0	No	9.29	Yes	Yes	No		No		Vocational		High school	University access exam	Yes		Yes	Yes	1	Yes	Other nursing students and from other degrees	Yes	No	Town	Satisfied	4	Quite	Extremely satisfied			Yes	More than half the days	Several days	Nearly every day	Several days	Nearly every day	Several days	More than half the days	Yes	Yes	No	Yes	No	Yes
70	0	20	Female	Single	No	No	0	No	9.09	Yes	Yes	No		Yes	4	Professional oportunities	1	High school	Professional job role formation	Yes		No	No		Yes	Colleagues from other degrees	Yes	No	Town	Extremely satisfied		Quite	Extremely satisfied		2	Yes	Not at all	Several days	Several days	Not at all	More than half the days	More than half the days	Several days	Yes	No	Yes	No	Yes	Yes
71	0	50	Female	Married	Yes, but not practicant	No	0	Yes	6.1	Yes	Yes	Yes	3	No		Vocational		secondary school	Professional job role formation	No	3	No	No		Yes	Mi husband	No	No	Town	Extremely satisfied	2	A lot	Very Satisfied		3	Yes	Several days	Several days	Several days	Several days	Several days	Several days	Several days	Yes	Yes	Yes	No	Yes	Yes
72	0	24	Female	Single	Yes, but not practicant	No	0	No	8.5	Yes	Yes	No		No		Vocational		High school	Professional job role formation	Yes		No	No		Yes	Colleagues from other degrees	No	Yes	City	Extremely satisfied	2	Not much	Extremely satisfied		4	No	Nearly every day	More than half the days	Nearly every day	Nearly every day	More than half the days	More than half the days	Nearly every day	Yes	Yes	Yes	Yes	Yes	Yes
73	0	49	Female	Divorced	No	Yes	3	Yes	7.5	Yes	Yes	Yes	6	Yes	6	Vocational	1	High school	Access entry (not after high school)	No	1	Yes	No		Yes	Family	Yes	Yes	Town	Not much Satisfied	2	Enough	Satisfied		3	Yes	More than half the days	More than half the days	Several days	More than half the days	Several days	Several days	Not at all	Yes	Yes	No	Yes	Yes	Yes
74	0	48	Female	Married	Yes, practicant	No	0	Yes	6.65	Yes	Yes	No		No		Vocational	1	secondary school	Access entry (not after high school)	No	1	No	Yes	7	Yes	husband	No	No	Town	Not much Satisfied		Enough	Satisfied		5	Yes	Several days	Several days	Several days	Several days	Several days	Not at all	Several days	No	Yes	No	Yes	No	No
75	0	21	Female	Single	No	No	0	No	7.44	Yes	No	No		No		Vocational		High school	Professional job role formation	Yes		Yes	No		Yes	Colleagues from other degrees	No	No	City	Extremely satisfied	1	Quite	Satisfied		3	Yes	More than half the days	More than half the days	Nearly every day	More than half the days	Several days	More than half the days	Nearly every day	Yes	Yes	Yes	Yes	Yes	No
76	0	20	Male	Single	Yes, but not practicant	No	0	No	8	Yes	Yes	No		No		Vocational		High school	University access exam	Yes		Yes	No		No	Colleagues from other degrees	Yes	Yes	City	Satisfied		A lot	Extremely satisfied		4	Yes	Several days	Several days	Several days	Several days, More than half the days	Not at all	More than half the days	More than half the days	Yes	Yes	Yes	No	Yes	Yes
77	0	27	Female	Single	No	No	0	Yes	8.6	No	Yes	No	2	No		Professional oportunities		High school	Access entry (not after high school)	Yes		Yes	No		Yes	Couple	Yes	Yes	Town	Satisfied	2	Enough	Satisfied			Yes	More than half the days	More than half the days	More than half the days	More than half the days	More than half the days	More than half the days	More than half the days	Yes	Yes	Yes, No	Yes, No	Yes, No	Yes
78	0	19	Female	Single	Yes, practicant	No	0	No	8.52	Yes	Yes	No		No		Vocational		High school	University access exam	No	1	Yes	Yes	1	Yes	Other nursing students and from other degrees	No	No	Town	Satisfied	1	Quite	Satisfied		5	Yes	More than half the days	Not at all	More than half the days	Several days	Several days	More than half the days	Not at all	Yes	No	Yes	Yes	No	Yes
79	0	22	Female	Single	Yes, but not practicant	No	0	No	9.54	No	No	Yes	1	Yes	1	Vocational		High school	University access exam	Yes		No	Yes	8	Yes	Other nursing students	Yes	No	Town	Satisfied	2	Not much	Satisfied		2	No	Nearly every day	Several days	More than half the days	More than half the days	Not at all	Several days	Not at all	Yes	Yes	Yes	Yes	Yes	Yes
80	0	18	Female	Single	Yes, but not practicant	No	0	No	9.3	No	Yes	No		No		Professional oportunities		High school	University access exam	Yes		Yes	No		No	Family	No	Yes	Town	Satisfied	2	Quite	Extremely satisfied		2	Yes	More than half the days	Several days	Several days	More than half the days	More than half the days	Nearly every day	More than half the days	Yes	Yes	Yes	Yes	Yes	Yes
81	0	20	Female	Single	Yes, practicant	No	0	No	7.5	Yes	Yes	No		No		Vocational		High school	Professional job role formation	Yes		Yes	No		Yes	Colleagues from other degrees	Yes	Yes	City	Extremely satisfied		Quite	Extremely satisfied		2	Yes	Nearly every day	More than half the days	Nearly every day	Nearly every day	More than half the days	Nearly every day	More than half the days	Yes	Yes	Yes	Yes	Yes	Yes
82	0	21	Female	Single	Yes, but not practicant	No	0	No	7.48	Yes	Yes	No		No		Vocational		High school	University access exam	Yes		No	No		Yes	Colleagues from other degrees	No	No	Town	Extremely satisfied	4	Quite	Very Satisfied		2	Yes	Nearly every day	More than half the days	Nearly every day	Nearly every day	More than half the days	More than half the days	More than half the days	Yes	Yes	Yes	Yes	Yes	Yes
83	1	20	Female	Other	No	No		No	7.8	No	Yes	No		No		Professional oportunities		High school	University access exam	Yes	4	Yes	No		Yes	Family	No	No	Town	Extremely satisfied	5	Quite	Extremely satisfied		5	Yes	Several days	Not at all	More than half the days	Not at all	Not at all	Several days	Not at all	No	No	No	No	No	No
84	1	21	Female	Single	Yes, but not practicant	No		No	8.2	Yes	Yes	No		No		Vocational		High school	Professional job role formation	No	4,5,6	No	No		No	Other nursing students	No	Yes	Town	Extremely satisfied		Enough	Extremely satisfied		6	Yes	Several days	Not at all	Several days	Not at all	Not at all	Not at all	Not at all	No	Yes	No	No	No	No
85	1	19	Female	Single	Yes, but not practicant	No	0	No	8	Yes	Yes	No		No		Vocational		High school	University access exam	Yes	1	No	No		Yes	Other nursing students and from other degrees	No	No	Town	Satisfied	0	A lot	Satisfied			Yes	Nearly every day	Several days	Several days	Several days	Several days	Several days	Nearly every day	Yes	Yes	Yes	Yes	No	Yes
86	1	22	Female	Other	No	No	0	No	8	No	Yes	No		No		Vocational		High school	Professional job role formation	No	4.6	Yes	Yes	2	Yes	Colleagues from other degrees	Yes	Yes	Town	Satisfied	4	Enough	Satisfied		2	Yes	Nearly every day	Several days	More than half the days	More than half the days	More than half the days	More than half the days	More than half the days	Yes	Yes	Yes	Yes	Yes	Yes
87	1	21	Female	Single	No	No		No	8	Yes	Yes	No	5	No		Vocational		High school	Professional job role formation	No	4.6	No	No		Yes	Colleagues from other degrees	No	No	Town	Extremely satisfied	3	Quite	Satisfied		5	Yes	Several days	Several days	More than half the days	Several days	Several days	Not at all, Several days	Several days	No	No	No	No	Yes	No
88	1	21	Female	Single	No	No	0	No	8	Yes	Yes	Yes	5	No		Vocational		High school	Professional job role formation	No	4,5,6	No	No		Yes	Other nursing students	Yes	Yes	Town	Extremely satisfied		Quite	Extremely satisfied			Yes	Several days	Not at all	Several days	Several days	Not at all	Not at all	Not at all	Yes	Yes	No	No	Yes	Yes
89	1	20	Female	Single	No	No		No	8	Yes	Yes	No		No		Vocational		High school	University access exam	Yes		No	No		No	Family	Yes	No	Town	Very Satisfied		A lot	Very Satisfied		2	Yes	Several days	Not at all	Several days	Not at all	Not at all	Several days	Several days	No	Yes	No	No	No	Yes
90	1	22	Female	Single	No	No	0	No	7	Yes	Yes	Yes	8	No		Vocational		High school	Professional job role formation	No	6	No	No		Yes	Family	Yes	Yes	City	Extremely satisfied		Quite	Extremely satisfied		2	Yes	Several days	More than half the days	Not at all	Not at all	Not at all	Several days	Not at all	Yes	Yes	No	No	No	Yes
91	1	22	Female	Other	Yes, practicant	No	0	No	7.85	Yes	No	No		No		Vocational		High school	University access exam	No	4	No	No		Yes	Other nursing students and from other degrees	Yes	No	City	Extremely satisfied		Quite	Satisfied		2	Yes	More than half the days	Not at all	Nearly every day	More than half the days	Several days	More than half the days	More than half the days	Yes	Yes	No	Yes	No	Yes
92	1	23	Female	Single	Yes, but not practicant	No	0	No	8.5	Yes	Yes	Yes	1	Yes	1	Vocational		High school	Professional job role formation	No		No	No		Yes	Other nursing students	Yes	No	City	Extremely satisfied		Quite	Extremely satisfied		2	Yes	Not at all	Not at all	Several days	More than half the days	Several days	More than half the days	More than half the days	No	Yes	Yes	Yes	Yes	No
93	1	49	Male	Single	No	No	0	No	8.18	Yes	Yes	No		No		Vocational		Estudios primarios	Access entry (not after high school)	No	4.6	Yes	No		No	No, yo vivo solo/a	No	Yes	Town	Satisfied	4	Quite	Extremely satisfied		2	Yes	Not at all	Not at all	Not at all	Not at all	Not at all	Not at all	Not at all	No	No	No	No	Yes	Yes
94	1	19	Female	Single	No	No	0	No	8.1	Yes	Yes	No		No		Vocational		High school	University access exam	No	4,5,6	No	No		No	Family	No	No	City	Extremely satisfied	4	Quite	Extremely satisfied			Yes	Several days	Not at all	Several days	Several days	Not at all	Several days	Not at all	No	No	Yes	Yes	Yes	No
95	1	19	Female	Other	No	No		Yes	9.6	Yes	Yes	No		No		Vocational		High school	University access exam	Yes		Yes	No		Yes	Family	No	Yes	City	Extremely satisfied	3	Quite	Extremely satisfied		2	Yes	Several days	Several days	More than half the days	Several days	Several days	Several days	Not at all	Yes	Yes	Yes	Yes	Yes	Yes
96	1	27	Female	Single	Yes, but not practicant	No		No	8	Yes	No	No		No		Professional oportunities		Máster	University access exam	Yes		No	No		Yes	No, yo vivo solo/a	No	No	Town	Satisfied	3	Quite	Extremely satisfied		2	Yes	Not at all	Not at all	Not at all	Not at all	Not at all	Several days	Not at all	Yes	No	No	Yes	No	No
97	1	21	Female	Single	Yes, but not practicant	No		No	7.9	No	No	No		No		Professional oportunities		High school	Professional job role formation	Yes		Yes	Yes	2	Yes	Family	No	No	Town	Satisfied	6	Enough	Extremely satisfied			No	More than half the days	More than half the days	Nearly every day	Nearly every day	More than half the days	More than half the days	Not at all	Yes	Yes	Yes	Yes	Yes	Yes
98	1	21	Female	Single	Yes, practicant	No	0	No	7.7	No	Yes	No		No		First option not available		High school	University access exam	No	6	Yes	No		Yes	Colleagues from other degrees	No	Yes	City	Satisfied	6	Quite	Extremely satisfied		2	Yes	More than half the days	Several days	More than half the days	More than half the days	Not at all	Several days	More than half the days	Yes	Yes	No	Yes	Yes	No
99	1	20	Female	Single	Yes, but not practicant	No	0	No	8.45	Yes	Yes	No		No		Vocational		High school	University access exam	Yes		Yes	No		No	Family	No	No	Town	Very Satisfied	1	A lot	Extremely satisfied		5	Yes	Several days	Not at all	Several days	Not at all	Not at all	Several days	Not at all	Yes	Yes	No	No	No	No
100	1	20	Female	Single	Yes, practicant	No		No	7.75	Yes	Yes	No		No		Professional oportunities		High school	University access exam	Yes		No	No		No	Family	No	No	City	Extremely satisfied	1	Quite	Extremely satisfied		2	Yes	Several days	Not at all	Several days	Not at all	Not at all	Several days	Not at all	Yes	No	No	Yes	No	Yes
101	1	19	Female	Single	Yes, practicant	No	0	No	7.4	Yes	No	No		No		Vocational		High school	University access exam	No	4,5,6	Yes	No		Yes	Family	No	No	Town	Satisfied	3	Quite	Satisfied			Yes	Several days	Not at all	Several days	Not at all	Several days	Several days	Several days	Yes	Yes	Yes	No	No	Yes
102	1	27	Female	Married	Yes, practicant	No	0	Yes	8.24	Yes	No	Yes	4	Yes	4	Professional oportunities		University	Other	Yes		No	No		No	Family	No	No	City	Satisfied		Enough	Satisfied		2	Yes	More than half the days	Several days	More than half the days	Nearly every day	More than half the days	Several days	More than half the days	Yes	Yes	No	Yes	Yes	Yes
103	1	20	Male	Single	No	No		No	7.65	Yes	Yes	No		No		Other: (specify)	1	High school	University access exam	No	6	No	No		No	Other nursing students and from other degrees	No	No	City	Satisfied	4	Quite	Very Satisfied			Yes	Several days	Not at all	Not at all	Not at all	Not at all	Not at all	Not at all	Yes	No	No	No	No	No
104	1	19	Female	Single	No	No		No	7.58	Yes	Yes	No		No		Vocational	1	High school	University access exam	No	6	No	No		No	Family	No	No	Town	Extremely satisfied	1	Quite	Extremely satisfied		2	Yes	Not at all	Not at all	Not at all	Not at all	Not at all	Not at all	Not at all	No	No	No	No	No	No
105	1	21	Male	Single	No	No		No	8.86	Yes	No	No		No		Vocational		High school	University access exam	Yes		No	No		Yes	Other nursing students	No	No	Town	Extremely satisfied	6	Quite	Extremely satisfied			Yes	Several days	Several days	More than half the days	Several days	Several days	Not at all	Not at all	Yes	Yes	No	Yes	Yes	Yes
106	1	25	Female	Single	No	No	0	No	7	No	No	No		No		Professional oportunities		University	University access exam	Yes		Yes	Yes	9	Yes	Mis compañer@s no son universitarios	Yes	No	City	Not much Satisfied	4	Enough	Satisfied		2	No	Nearly every day	More than half the days	Nearly every day	Nearly every day	Nearly every day	More than half the days	Nearly every day	Yes	Yes	Yes	Yes	Yes	Yes
107	1	19	Female	Single	Yes, but not practicant	No	0	No	8.14	Yes	Yes	No		No		Vocational		High school	University access exam	No	4.6	Yes	No		Yes	Family	No	No	Town	Extremely satisfied		A lot	Satisfied			Yes	Several days	Not at all	Several days	Several days	Not at all	Not at all	Not at all	Yes	Yes	No	Yes	No	No
108	1	20	Male	Single	Yes, but not practicant	No	0	No	8.14	Yes	Yes	No		No		Professional oportunities		High school	University access exam	Yes		No	No		Yes	Family	No	Yes	Town	Satisfied	3	Quite	Extremely satisfied		4	Yes	Not at all	Not at all	Several days	Not at all	Not at all	Several days	Not at all	Yes	Yes	Yes	No	No	No
109	1	21	Male	Single	No	No		No	7.97	No	Yes	No		No		Professional oportunities		High school	Professional job role formation	Yes		Yes	No		No	Family	No	Yes	City	Extremely satisfied	4	Quite	Satisfied		2	No	Several days	Not at all	Several days	Not at all	Not at all	More than half the days	Not at all	Yes	No	Yes	No	No	No
110	1	21	Female	Single	Yes, but not practicant	No	0	No	8.5	Yes	Yes	No		No		Vocational		High school	Professional job role formation	No	4,5,6	No	Yes	1	Yes	Family	Yes	No	Town	Extremely satisfied	6	A lot	Satisfied		7	Yes	Several days	Not at all	Not at all	Not at all	Not at all	Several days	Not at all	No	No	No	No	No	Yes
111	1	19	Female	Single	Yes, but not practicant	No	0	No	8.41	Yes	Yes	No		No		Vocational		High school	University access exam	Yes		Yes	No		Yes	Other nursing students and from other degrees	Yes	Yes	Town	Extremely satisfied	6	A lot	Extremely satisfied		4	Yes	More than half the days	Several days	More than half the days	Several days	Not at all	Several days	More than half the days	Yes	Yes	No	Yes	Yes	No
112	1	20	Female	Single	Yes, but not practicant	No		No	7.8	Yes	No	Yes	3	Yes	11	Vocational		High school	University access exam	Yes		Yes	No		Yes	Other	Yes	No	Town	Satisfied		A lot	Satisfied		9	Yes	Several days	Several days	Several days	Several days	Several days	More than half the days	More than half the days	Yes	Yes	Yes	Yes	Yes	Yes
113	1	22	Female	Single	Yes, but not practicant	No	0	No	8.2	Yes	Yes	No		No		Vocational		High school	Professional job role formation	No	6	Yes	Yes	7	No	Other nursing students	No	Yes	City	Extremely satisfied		Quite	Extremely satisfied		8	Yes	Not at all	Not at all	Several days	Several days	Several days	Several days	Several days	No	Yes	Yes	Yes	No	No
114	1	20	Female	Single	Yes, but not practicant	No		No	8.15	Yes	Yes	No		No		Vocational		High school	University access exam	No	6	Yes	No		Yes	Other nursing students	Yes	No	Town	Extremely satisfied	1	Quite	Extremely satisfied		2	Yes	Several days	Not at all	Not at all	Not at all	Not at all	Not at all	Several days	No	No	No	No	No	No
115	1	26	Female	Single	No	No	0	No	8.1	No	No	Yes	10	Yes	10	salary		Máster	Other	Yes		Yes	No		No	Colleagues from other degrees	No	Yes	City	Extremely satisfied	1	Quite	Very Satisfied		8	Yes	Several days	Not at all	Several days	Several days	Not at all	Several days	Not at all	Yes	No	No	Yes	Yes	Yes
116	1	19	Male	Single	No	No		No	8.12	No	No	No		No		Vocational		High school	University access exam	No	6	No	No		No	Colleagues from other degrees	Yes	Yes	City	Satisfied	3	Quite	Satisfied		6	Yes	Several days	Several days	More than half the days	Several days	Not at all	Not at all	Not at all	Yes	Yes	No	Yes	Yes	No
117	1	20	Female	Single	No	No		No	0	Yes	Yes	No		No		Vocational	1	High school	University access exam	Yes		Yes	No		No	En una residencia	Yes	No	Town	Extremely satisfied		Quite	Extremely satisfied		8	Yes	Not at all	Not at all	Not at all	Not at all	Not at all	Not at all	Not at all	No	No	No	No	No	No
118	1	22	Female	Single	Yes, but not practicant	No	0	No	8.16	Yes	Yes	No		No		Vocational		High school	Professional job role formation	Yes		Yes	No		Yes	Other nursing students	Yes	Yes	Town	Extremely satisfied		A lot	Very Satisfied		3	Yes	Several days	Not at all	Not at all	Several days	Not at all	Not at all	Not at all	Yes	No	No	Yes	Yes	Yes
119	1	20	Female	Single	No	No	0	No	8.75	Yes	Yes	No		No		Vocational		High school	University access exam	No	6	No	No		Yes	Family	Yes	No	City	Extremely satisfied	4	Quite	Extremely satisfied		8	Yes	More than half the days	More than half the days	Nearly every day	Several days	Several days	More than half the days	Not at all	Yes	Yes	No	Yes	No	Yes
120	1	19	Male	Single	Yes, but not practicant	No	0	No	8	Yes	No	No		No		Professional oportunities		High school	University access exam	No	6	No	No		No	Family	Yes	No	Town	Satisfied	4	Enough	Very Satisfied		4	Yes	Several days	Several days	Several days	More than half the days	Several days	Nearly every day	More than half the days	Yes	No	Yes	Yes	No	No
121	1	19	Female	Single	Yes, but not practicant	No	0	No	7.87	No	Yes	No		No		First option not available		High school	University access exam	Yes		Yes	Yes	1	No	Family	Yes	Yes	City	Satisfied	5	Quite	Extremely satisfied		9	Yes	Not at all	Not at all	Not at all	Not at all	Not at all	Not at all	Not at all	No	No	No	No	No	No
122	1	19	Female	Other	No	No	0	No	6.64	Yes	No	No		No		Other: (specify)	4	High school	University access exam	No	4.6	Yes	No		Yes	Family	Yes	Yes	City	Extremely satisfied	4	Quite	Satisfied		8	Yes	Nearly every day	Nearly every day	Nearly every day	More than half the days	Not at all	Several days	Nearly every day	Yes	Yes	No	Yes	No	Yes
123	1	21	Female	Single	Yes, practicant	No	0	No	7.42	Yes	Yes	No		No		Vocational	1	High school	Professional job role formation	No	6, 7	Yes	No		Yes	Colleagues from other degrees	No	No	City	Extremely satisfied	1	Quite	Extremely satisfied			Yes	Several days	Several days	More than half the days	Several days	Several days	Several days	Several days	Yes	Yes	No	Yes	No	Yes
124	1	22	Female	Single	Yes, but not practicant	No	0	No	7	Yes	Yes	No		No		Vocational		High school	Professional job role formation	No	1,4,5,6	No	No		No	Family	Yes	No	City	Satisfied	1	Enough	Satisfied		2	No	Not at all	Not at all	Not at all	Not at all	Not at all	Several days	Several days	No	No	No	No	Yes	Yes
125	1	19	Male	Single	Yes, but not practicant	No	0	No	8	Yes	Yes	No		No		Professional oportunities		High school	University access exam	No	4,5,6,7	No	No		No	Family	Yes	Yes	Town	Satisfied	2	Quite	Satisfied		2	Yes	Not at all	Not at all	Several days	Several days	Not at all	Not at all	Several days	No	No	No	No	Yes	No
126	1	19	Female	Single	Yes, but not practicant	No	0	No	8.12	No	Yes	No		No		First option not available		High school	University access exam	Yes		Yes	No		No	Family	Yes	Yes	City	Extremely satisfied	7	Quite	Extremely satisfied		6	Yes	Not at all	Not at all	Not at all	Not at all	Not at all	Not at all	Not at all	Yes	No	No	No	No	No
127	1	20	Female	Single	No	No	0	No	7.5	No	Yes	No		No		Professional oportunities		High school	University access exam	Yes		No	No		Yes	Other nursing students	No	No	Town	Satisfied	1	Quite	Satisfied		7	Yes	Several days	Several days	Several days	More than half the days	Several days	Not at all	Several days	No	Yes	No	Yes	No	Yes
128	1	22	Male	Single	Yes, but not practicant	No	0	No	8	Yes	No	No		No		Professional oportunities		High school	Professional job role formation	No	6.8	Yes	No		No	Other nursing students	No	Yes	Town	Extremely satisfied		Quite	Extremely satisfied		2	Yes	Several days	Not at all	Not at all	Not at all	Not at all	Several days	Several days	Yes	No	No	No	No	No
129	1	19	Female	Other	Yes, but not practicant	No		No	9	Yes	Yes	No		No		Vocational		High school	University access exam	Yes		Yes	No		Yes	Colleagues from other degrees	Yes	Yes	Town	Very Satisfied		A lot	Very Satisfied			Yes	Several days	Not at all	Several days	Not at all	Not at all	Several days	Several days	Yes	Yes	No	No	Yes	No
130	1	29	Female	Single	Yes, but not practicant	Yes	1	Yes	7	Yes	Yes	No		No		Vocational		High school	Access entry (not after high school)	No	4,5,6	No	No		Yes	Mi hijo	Yes	No	City	Satisfied	4	Quite	Satisfied		2	Yes	Several days	Not at all	Several days	Not at all	Not at all	Not at all	Not at all	No	Yes	No	No	No	Yes
131	1	20	No binario	Single	No	No	0	No	8	No	No	No		No		First option not available		High school	University access exam	Yes		No	No		Yes	Family	No	Yes	City	Extremely satisfied	4	Quite	Extremely satisfied			Yes	Nearly every day	More than half the days	More than half the days	Nearly every day	Nearly every day	Several days	Nearly every day	Yes	Yes	No	Yes	Yes	No
132	1	19	Female	Single	Yes, practicant	No		No	8.83	Yes	Yes	No		No		Professional oportunities		High school	University access exam	Yes		No	No		No	Family	No	No	Town	Extremely satisfied	1	Quite	Extremely satisfied		2	Yes	More than half the days	Not at all	Several days	Several days	Several days	Several days	Several days	Yes	Yes	Yes	Yes	No	No
133	1	30	Female	Single	No	Yes		No	7	Yes	Yes	No		No		Professional oportunities		High school	Access entry (not after high school)	No	4,5,6	Yes	No		Yes	Family	No	Yes	City	Extremely satisfied		Quite	Extremely satisfied		1	Yes	Not at all	Not at all	Not at all	Not at all	Not at all	Not at all	Not at all	No	No	No	No	No	No
134	1	51	Male	Married	Yes, but not practicant	Yes	2	Yes	6.27	Yes	No	Yes	6	Yes		Vocational		Estudios primarios	Access entry (not after high school)	No	1,8,6	No	Yes	8	No	Mujer e hijos	Yes	No	Town	Extremely satisfied		A lot	Very Satisfied			Yes	Not at all	Not at all	Several days	Not at all	Not at all	Not at all	Not at all	Yes	No	No	No	No	No
135	1	20	Female	Single	Yes, but not practicant	No	0	No	7.11	Yes	No	No		No		Vocational		High school	University access exam	No	4,5,6,8	No	No		Yes	Family	Yes	No	City	Satisfied	7	Quite	Satisfied			No	More than half the days	Several days	Nearly every day	Several days	Several days	Nearly every day	Several days	Yes	Yes	Yes	Yes	Yes	Yes
136	1	19	Female	Other	Yes, but not practicant	No	0	No	7.54	Yes	No	No		No		Vocational		High school	University access exam	No	4,5,6	No	No		Yes	Other nursing students and from other degrees	No	No	Town	Extremely satisfied	6	Quite	Satisfied		5	Yes	Several days	Not at all	More than half the days	Not at all	Not at all	Several days	More than half the days	No	Yes	No	No	No	No
137	1	21	Female	Single	Yes, but not practicant	No		No	8.02	Yes	Yes	No		No		Vocational		High school	Professional job role formation	No	6	No	No		Yes	Colleagues from other degrees	No	No	City	Extremely satisfied	1	Quite	Extremely satisfied		2	Yes	Several days	Not at all	More than half the days	More than half the days	Several days	Several days	Not at all	No	No	No	Yes	Yes	Yes
138	1	21	Female	Single	Yes, practicant	No	0	No	8.06	Yes	Yes	No		No		Vocational		High school	Professional job role formation	No	4	Yes	No		Yes	Other nursing students and from other degrees	No	Yes	Town	Satisfied	1	A lot	Extremely satisfied		5	Yes	More than half the days	Not at all	More than half the days	Several days	Not at all	Nearly every day	Several days	Yes	No	Yes	No	Yes	Yes
139	1	19	Female	Single	Yes, practicant	No		No	8.7	Yes	Yes	No		No		Vocational		High school	University access exam	No	6	Yes	No		Yes	Family	Yes	Yes	City	Extremely satisfied		Quite	Extremely satisfied		8	Yes	Several days	Not at all	More than half the days	Not at all	Not at all	Nearly every day	Several days	Yes	Yes	Yes	No	No	Yes
140	1	20	Female	Single	No	No		No	8	Yes	No	No		No		Vocational		High school	University access exam	No	6	No	No		No	Other nursing students	Yes	No	Town	Extremely satisfied	1	Quite	Extremely satisfied		8	Yes	Several days	Not at all	Several days	Not at all	Not at all	Several days	Several days	No	Yes	Yes	Yes	No	Yes
141	1	27	Male	Other	No	No	0	Yes	7	No	Yes	No		No		Vocational		High school	Access entry (not after high school)	No	6	Yes	No		Yes	Family	Yes	Yes	City	Extremely satisfied	7	Quite	Extremely satisfied		5	Yes	More than half the days	Not at all	Several days	Several days	Not at all	Not at all	Not at all	No	No	No	No	No	No
142	1	20	Female	Single	No	No	0	No	8.17	Yes	Yes	No		No		Vocational		High school	University access exam	Yes		Yes	No		No	Colleagues from other degrees	Yes	Yes	City	Extremely satisfied	3	A lot	Very Satisfied			Yes	Several days	Not at all	Not at all	Not at all	Not at all	Not at all	Not at all	No	No	No	No	No	No
143	1	21	Female	Single	Yes, but not practicant	No		No	7.95	Yes	Yes	No		No		Vocational		High school	Professional job role formation	No	6	Yes	No		Yes	Family	No	No	Town	Extremely satisfied	3	Enough	Satisfied		2	Yes	Several days	Several days	More than half the days	Several days	Several days	Several days	Several days	Yes	Yes	Yes	No	Yes	No
144	1	19	Female	Single	Yes, but not practicant	No	0	No	7	No	Yes	No		No		Vocational		High school	University access exam	No	4.6	No	Yes	7	Yes	Colleagues from other degrees	No	Yes	Town	Not much Satisfied	7	Quite	Satisfied			Yes	Nearly every day	Nearly every day	Nearly every day	Nearly every day	Nearly every day	More than half the days	Nearly every day	Yes, No	Yes	Yes	Yes	Yes	Yes
145	1	19	Female	Single	Yes, but not practicant	No		No	7.71	Yes	No	No		No		Other: (specify)	1	High school	University access exam	No	6	Yes	No		Yes	Compañeros de enfermería y Others titulaciones	Yes	No	City	Satisfied	4	Quite	Extremely satisfied		2	Yes	Several days	Several days	Several days	Several days	Not at all	Several days	Several days	Yes	Yes	Yes	Yes	No	No
146	1	19	Female	Other	No	No	0	No	8	No	No	No		No		Professional oportunities		High school	University access exam	No	6.8	Yes	No		No	Family	Yes	No	City	Satisfied	6	Quite	Extremely satisfied		5	Yes	Not at all	Not at all	Not at all, Several days	Several days	Not at all	Several days	Not at all	Yes	No	Yes	Yes	Yes	Yes
147	1	22	Female	Single	No	No		No	8.25	Yes	No	Yes	1	No		Vocational		High school	Professional job role formation	No	6	No	No		No	Family	Yes	No	Town	Extremely satisfied	2	A lot	Very Satisfied			Yes	Several days	Several days	Several days	Not at all	Not at all	Not at all	Several days	Yes	No	No	No	Yes	No
148	1	19	Female	Single	Yes, but not practicant	No		No	7.58	Yes	Yes	No		No		Vocational		High school	University access exam	No	4.6	No	No		Yes	Colegio Mayor	Yes	No	City	Extremely satisfied		A lot	Very Satisfied		2	Yes	Several days	Not at all	Several days	Not at all	Not at all	Not at all, Several days	Not at all	Yes	No	No	No	No	No
149	1	19	Female	Other	Yes, practicant	No	0	No	6	Yes	No	No		No		Other: (specify)	5	High school	University access exam	No	1,4,5,8	No	No		Yes	Family	Yes	Yes	City	Satisfied	7	Quite	Extremely satisfied			No	Several days	Several days	More than half the days	More than half the days	Not at all	More than half the days	Not at all	Yes	Yes	Yes	Yes	No	Yes
150	1	20	Male	Single	Yes, but not practicant	No	0	No	7.64	No	No	No		No		First option not available		High school	University access exam	No	4.6	Yes	No		No	Colleagues from other degrees	No	No	Town	Satisfied		Enough	Satisfied		2	Yes	Not at all	Not at all	Not at all	Several days	Not at all	Several days	More than half the days	No	No	Yes	No	Yes	No
151	1	19	Female	Single	Yes, but not practicant	No	0	No	8.11	No	No	No		No		Professional oportunities		High school	University access exam	No	4,5,6	No	No		Yes	Family	No	Yes	City	Satisfied	5	Quite	Extremely satisfied		2	Yes	More than half the days	Several days	More than half the days	More than half the days	Several days	More than half the days	More than half the days	Yes	Yes	Yes	Yes	Yes	Yes
152	1	20	Female	Single	Yes, but not practicant	No	0	No	8.68	Yes	Yes	No		No		Vocational		High school	University access exam	Yes		No	No		Yes	Family	Yes	No	Town	Extremely satisfied	1	Quite	Extremely satisfied		7	Yes	Several days	Not at all	Several days	Several days	Several days	Several days	Several days	Yes	No	Yes	No	Yes	No
153	1	21	Female	Single	Yes, practicant	No	0	No	8.5	Yes	No	No		No		Vocational		High school	University access exam	Yes		No	Yes	7	Yes	Other nursing students	Yes	Yes	Town	Extremely satisfied	1	Quite	Satisfied		7	Yes	More than half the days	Several days	Several days	More than half the days	Nearly every day	Nearly every day	Several days	Yes	Yes	Yes	Yes	Yes	No
154	1	23	Female	Single	Yes, but not practicant	No	0	No	6	Yes	No	No		Yes	1	Vocational		High school	Professional job role formation	No	3.4.5.6	No	No		No	Mis compañer@s no son universitarios	Yes	No	City	Very Satisfied		A lot	Very Satisfied			Yes	Several days	Not at all	Not at all	Not at all	Not at all	Not at all	Not at all	No	No	No	No	No	No
155	1	19	Female	Single	No	No		No	8.16	Yes	Yes	No		No		Other: (specify)	4	High school	University access exam	No	4.5	No	No		No	Family	No	Yes	Town	Satisfied	1	Quite	Extremely satisfied		2	Yes	More than half the days	More than half the days	More than half the days	More than half the days	Several days	Several days	More than half the days	Yes	Yes	Yes	Yes	Yes	Yes
156	1	46	Female	Married	Yes, but not practicant	Yes	2	Yes	7.8	Yes	Yes	No		No		Vocational		secondary school	Access entry (not after high school)	No	4.6	No	No		No	Family	Yes	No	City	Satisfied	1	Quite	Satisfied		2	Yes	Not at all	Nearly every day	Several days	Several days	Not at all	Several days	Not at all	Yes	No	No	No	No	Yes
157	1	55	Female	Divorced	Yes, practicant	Yes	2	Yes	7.5	Yes	Yes	Yes	3	Yes	3	Vocational	6	High school	Access entry (not after high school)	No	4.5	No	Yes	6	Yes	Family	No	No	City	Satisfied	4	Enough	Extremely satisfied		2	Yes	More than half the days	Several days	Several days	Several days	Not at all	Several days	Several days	Yes	Yes	Yes	No	No	No
158	1	20	Female	Single	Yes, practicant	No	0	No	8.75	Yes	Yes	No		No		Vocational	1	High school	University access exam	No	6	Yes	No		Yes	Other nursing students and from other degrees	Yes	Yes	Town	Satisfied	5	Quite	Extremely satisfied			Yes	Several days	Several days	Several days	Several days	Several days	Several days	Several days	Yes	Yes	Yes	Yes	Yes	No
159	1	21	Female	Single	No	No	0	No	8.3	No	Yes	No		No		First option not available		High school	University access exam	No	6	Yes	No		Yes	Family	Yes	Yes	City	Not much Satisfied	4	Not much	Satisfied		9	No	More than half the days	More than half the days	More than half the days	More than half the days	Several days	Nearly every day	Not at all	Yes	Yes	Yes	Yes	Yes	No
160	1	19	Female	Single	Yes, but not practicant	No		No	8	Yes	Yes	No		No		Professional oportunities	1	High school	University access exam	No	8	No	No		Yes	Other nursing students and from other degrees	Yes	No	Town	Satisfied	1	Quite	Extremely satisfied		8	Yes	Several days	Not at all	Not at all	Several days	Several days	Several days	Several days	Yes	Yes	No	Yes	No	No
161	1	21	Female	Single	No	No	0	No	0	Yes	No	No		No		Vocational	1	High school	University access exam	No	6	No	Yes	7	No	Colleagues from other degrees	Yes	Yes	Town	Extremely satisfied	6	A lot	Satisfied			Yes	Several days	Not at all	Not at all	Several days	Not at all	More than half the days	Not at all	No	No	Yes	Yes	Yes	No
162	1	19	Male	Single	No	No	0	No	7.9	Yes	No	No		No		Professional oportunities		High school	University access exam	No	4	Yes	No		No	Family	No	Yes	City	Satisfied	4	Quite	Extremely satisfied		8	Yes	Not at all	Not at all	Not at all	Not at all	Not at all	Not at all	Not at all	No	No	No	No	Yes	No
163	1	20	Female	Single	Yes, but not practicant	No		No	7	Yes	No	No		No		Vocational		High school	University access exam	Yes		Yes	No		No	Colleagues from other degrees	Yes	No	City	Very Satisfied	3	A lot	Very Satisfied		2	Yes	Several days	Not at all	Not at all	Several days	Not at all	Several days	Not at all	Yes	No	No	Yes	Yes	No
164	1	21	Male	Single	Yes, but not practicant	No	0	No	7	Yes	Yes	Yes	3	Yes	3	Vocational	1	secondary school	University access exam	No	4.6	No	No		No	Other nursing students	No	Yes	Town	Extremely satisfied	1	Quite	Very Satisfied			Yes	Not at all	Not at all	Not at all	Not at all	More than half the days	Not at all	Not at all	No	No	No	No	No	No
165	1	19	Female	Single	Yes, but not practicant	No		No	6.33	No	No	No	3	No		Vocational		High school	University access exam	Yes		Yes	No		No	Family	No	Yes	City	Not much Satisfied	1	A lot	Very Satisfied			Yes	Several days	Not at all, Several days	Not at all	Not at all, Several days	Not at all	Not at all	Not at all	Yes	No	No	No	No	No
166	1	20	Male	Single	Yes, but not practicant	No	0	No	9.33	No	Yes	No		No		Professional oportunities		High school	University access exam	No		No	No		Yes	Colleagues from other degrees	No	No	City	Extremely satisfied	4	Quite	Extremely satisfied		5	No	More than half the days	Nearly every day	More than half the days	More than half the days	Several days	Several days	Several days	Yes	Yes	No	Yes	Yes	No
167	1	21	Female	Single	Yes, but not practicant	No		No	7.4	Yes	Yes	No		No		Vocational		High school	Professional job role formation	No	4.5	No	Yes	10	Yes	Colleagues from other degrees	No	No	Town	Satisfied	1	A lot	Satisfied		7	Yes	Several days	Not at all	More than half the days	Several days	Not at all	Several days	Several days	Yes	Yes	No	No	Yes	Yes
168	1	22	Female	Single	No	No		No	8.18	Yes	Yes	Yes	5	No		Vocational		High school	Professional job role formation	Yes		Yes	No		Yes	Family	Yes	Yes	Town	Extremely satisfied	1	Quite	Extremely satisfied		5	Yes	Several days	Several days	More than half the days	More than half the days	Several days	Several days	Not at all, Several days	Yes	Yes	Yes	Yes	Yes	Yes
169	1	19	Female	Single	Yes, but not practicant	No	0	No	8	Yes	Yes	No		No		Vocational		High school	University access exam	No	6	Yes	No		No	Other nursing students	No	Yes	Town	Satisfied	3	Enough	Satisfied		5	Yes	Not at all	Not at all	Not at all	Not at all	Not at all	Not at all	Not at all	No	Yes, No	No	No	No	No
170	1	24	Female	Single	Yes, but not practicant	No	0	No	7.8	Yes	Yes	No		Yes	1	Vocational		secondary school	Professional job role formation	No	4,5,6,8	No	No		Yes	Colleagues from other degrees	No	No	City	Satisfied	1	Quite	Satisfied		2	Yes	Not at all	Not at all	Nearly every day	More than half the days	Several days	Not at all	Not at all	No	No	No	Yes	Yes	Yes
[truncated: 4 more columns]
